# Supplementary material for: WGS-Based Lineage and Antimicrobial Resistance Pattern of Salmonella Typhimurium Isolated during 2000–2017 in Peru
Source: MDPI journal article supplement (doi:10.3390/antibiotics11091170), 2022-08-30

**Figure S1.** Whole-genome Average Nucleotide Identity (ANI) and sequence type: A) 140 peruvian and global *Salmonella* Typhimurium strains B) 90 peruvian *Salmonella* Typhimurium strains.

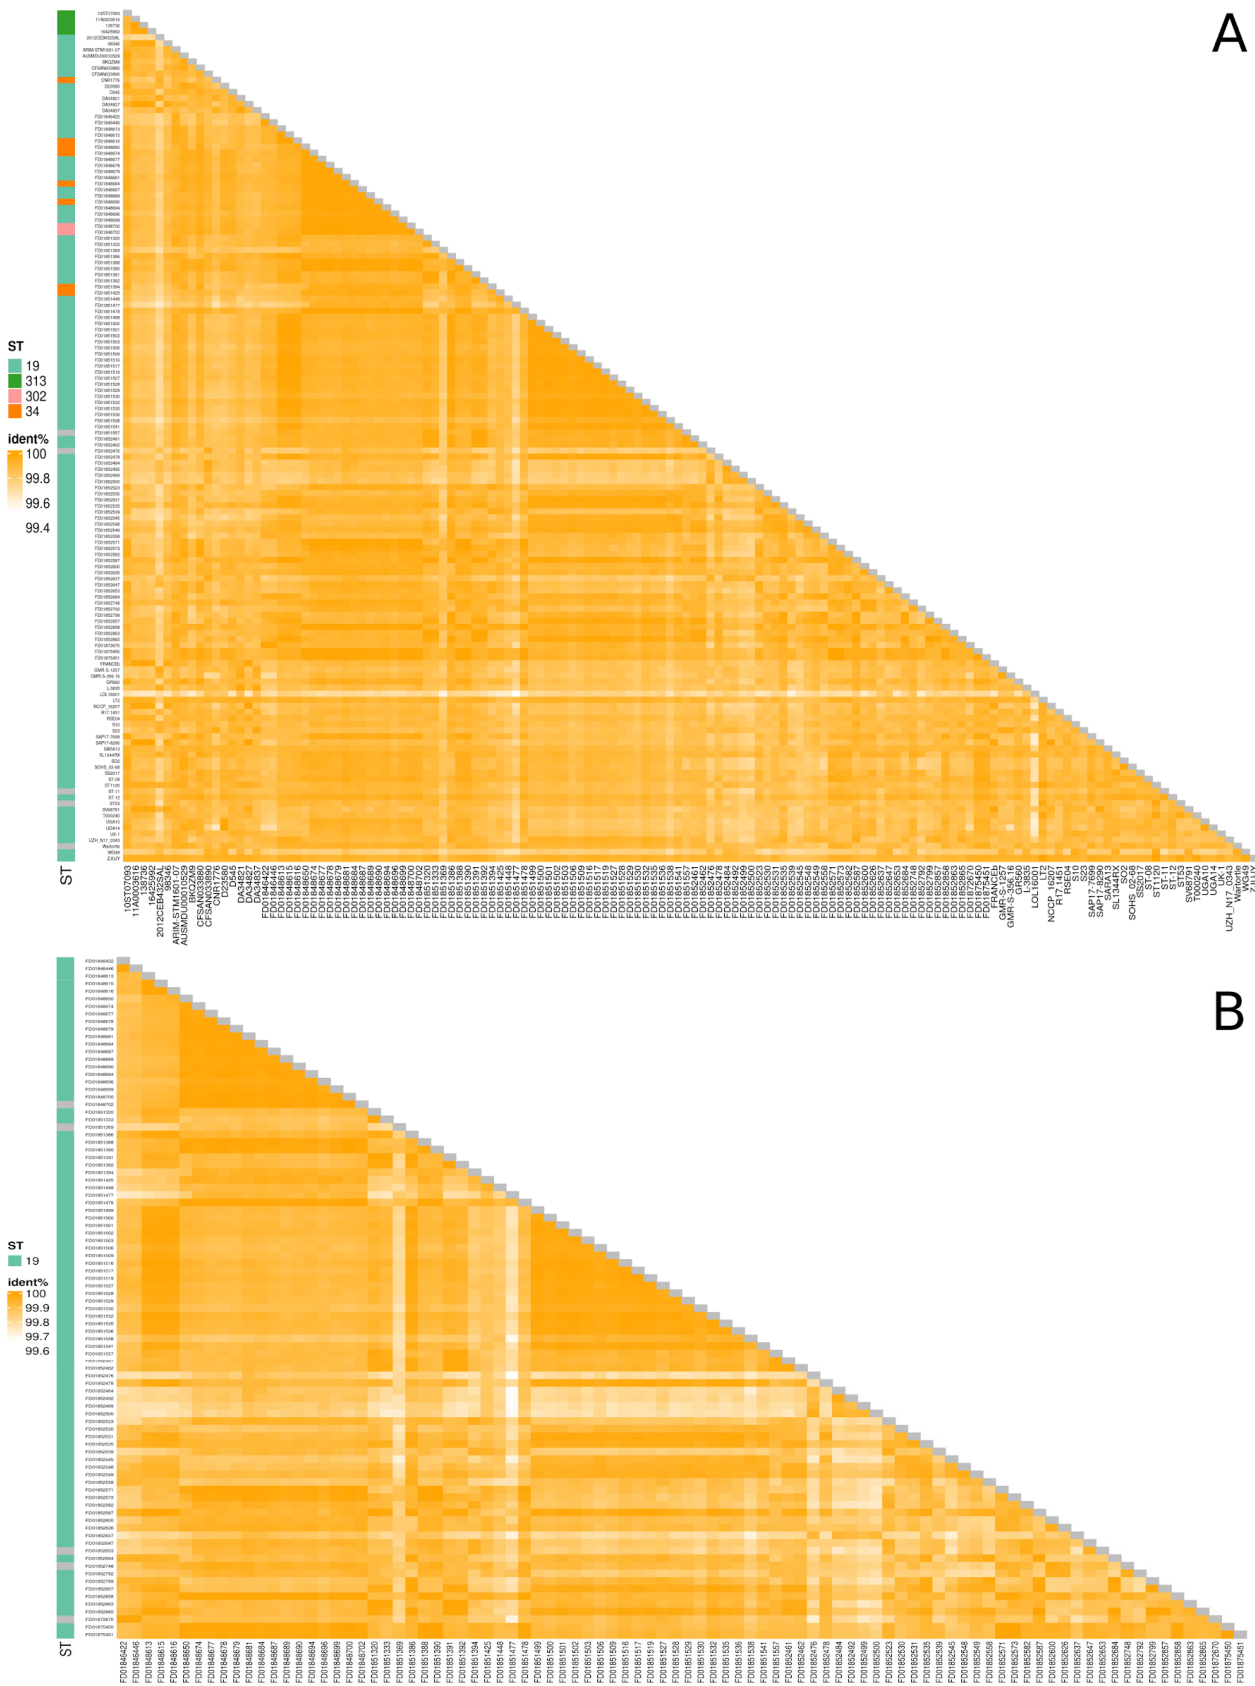

**Figure S2.** Nucleotide similarity and sequence type: A) 140 peruvian and global *Salmonella* Typhimurium strains B) 90 peruvian *Salmonella* Typhimurium strains.

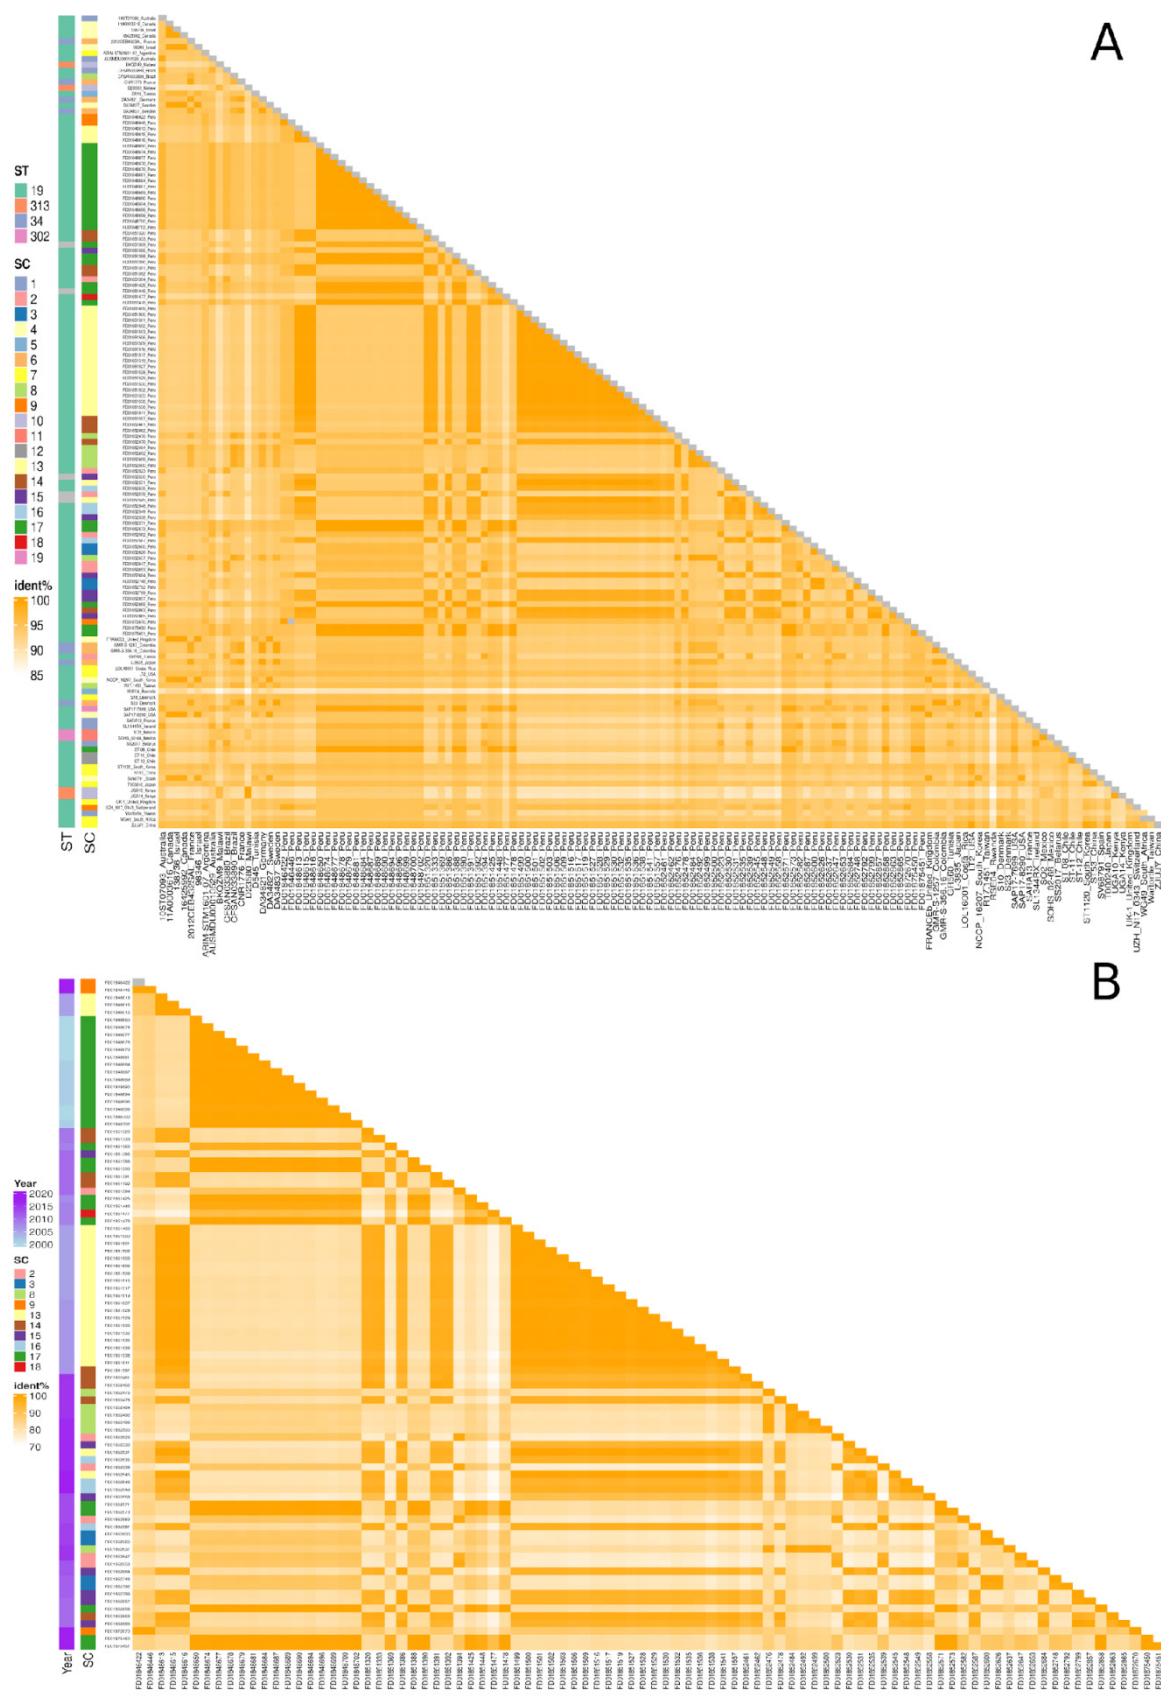

**Figure S3.** Phylogenetic tree was generated using a maximum likelihood method with 1000 replicates of bootstrap using GTR+GAMMA to estimate evolutionary distance between 140 global isolates. The phylogenetic tree was clustered into at least two large clades and segregated into at least nineteen sub-clades.

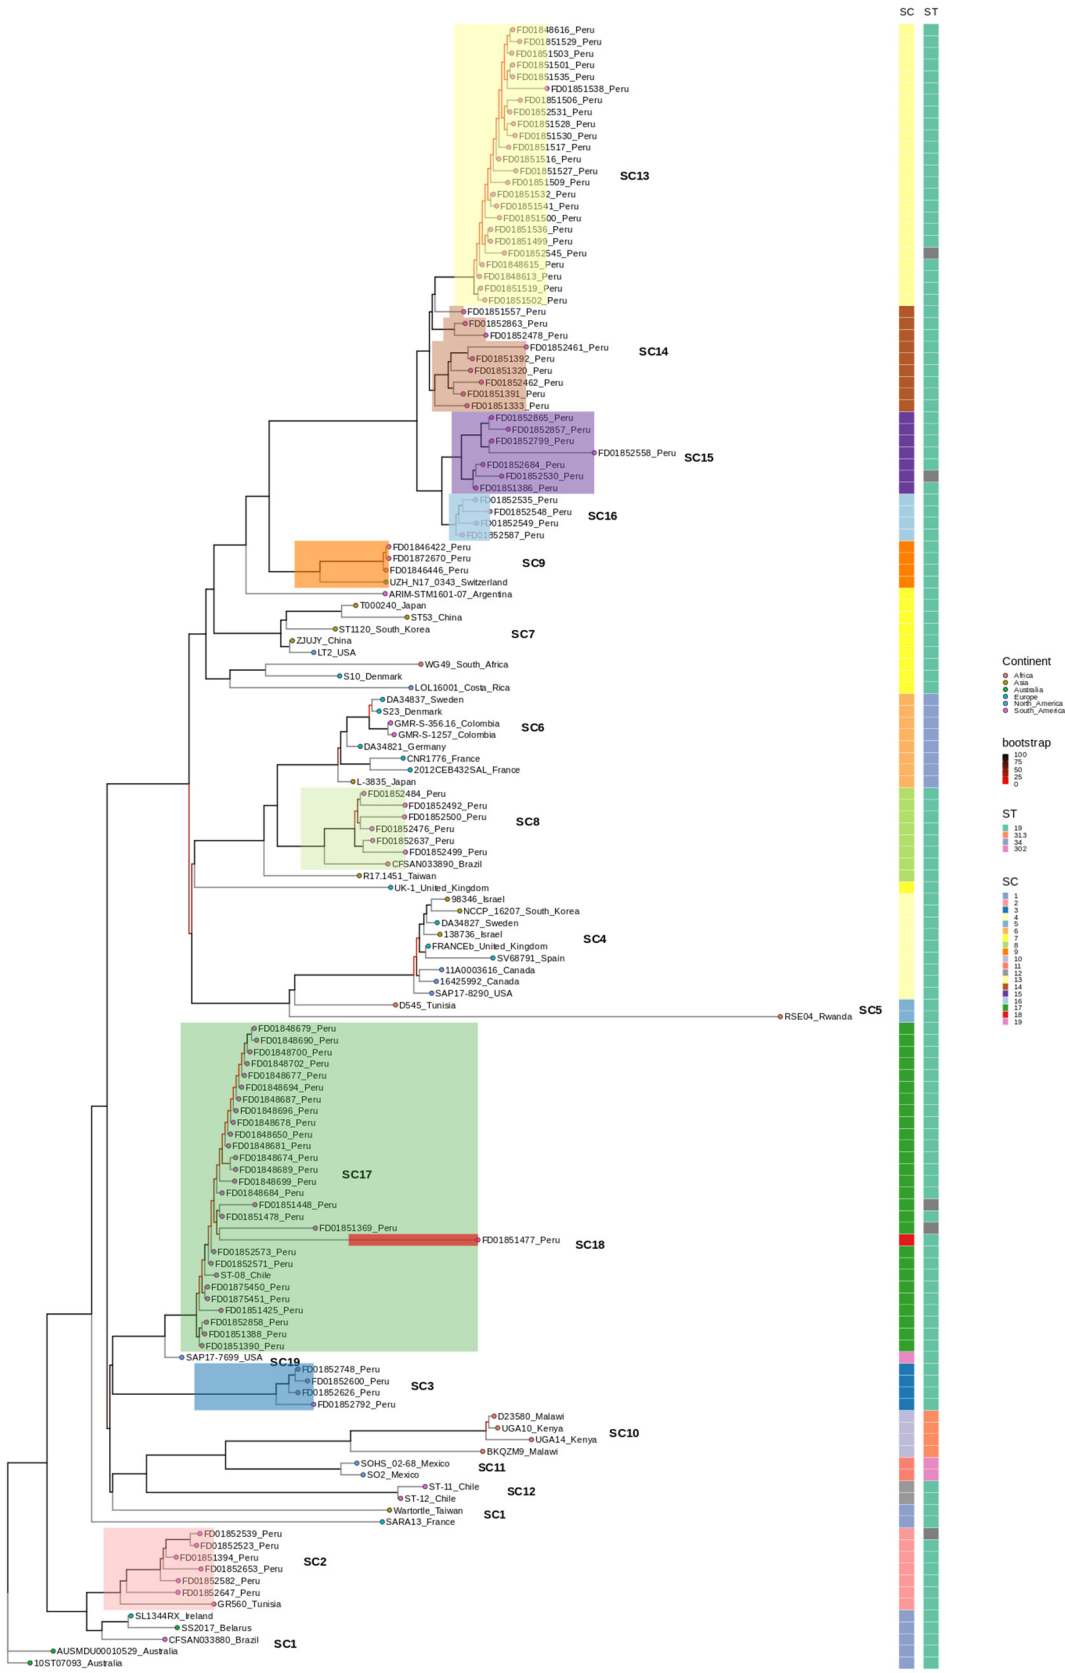

Supplement: s1 [file s1]
