# Supplementary material for: WGS-Based Lineage and Antimicrobial Resistance Pattern of Salmonella Typhimurium Isolated during 2000–2017 in Peru
Source: MDPI journal article supplement (doi:10.3390/antibiotics11091170), 2022-08-30
Supplement: s1 [file s1]

**Supplementary material S1.** Model quality validation: The 3D structures were generated using SWISS-MODEL and evaluated using Ramachandram plot.

**Analysis of structure proteins with to new and known variants on AMR genes**

**parC**

Swiss Model template- PDB: 1zvu.1.A, identity is 71%.

Selected model: 1, chain A

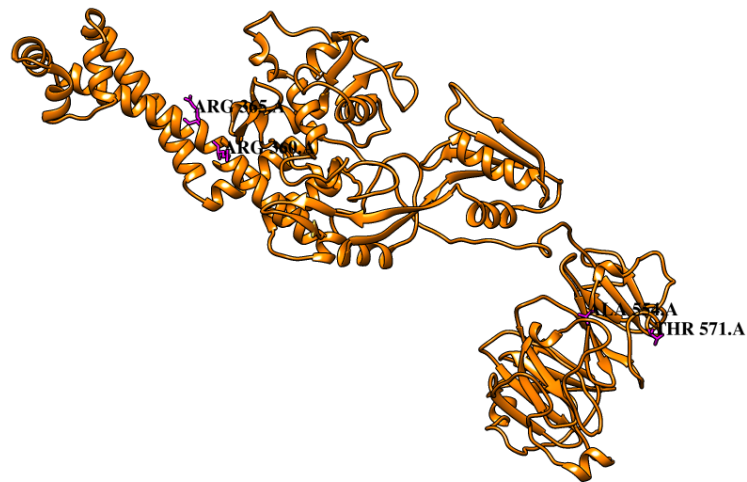

Ramachandran Plot result:

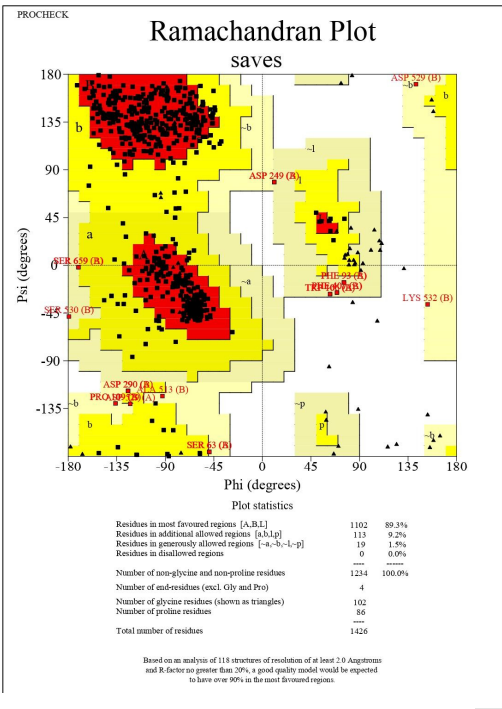

*gyrA*

Swiss Model template-PDB:  
67%,

Selected model no: 2,

6rkv.1.C, identity is

chain B

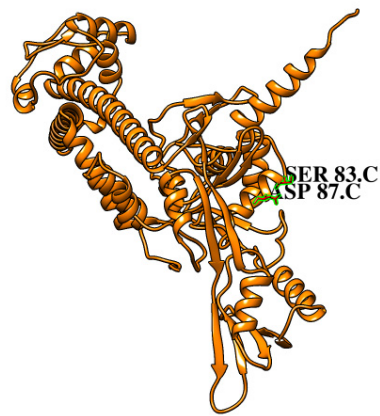

Ramachandran Plot result:

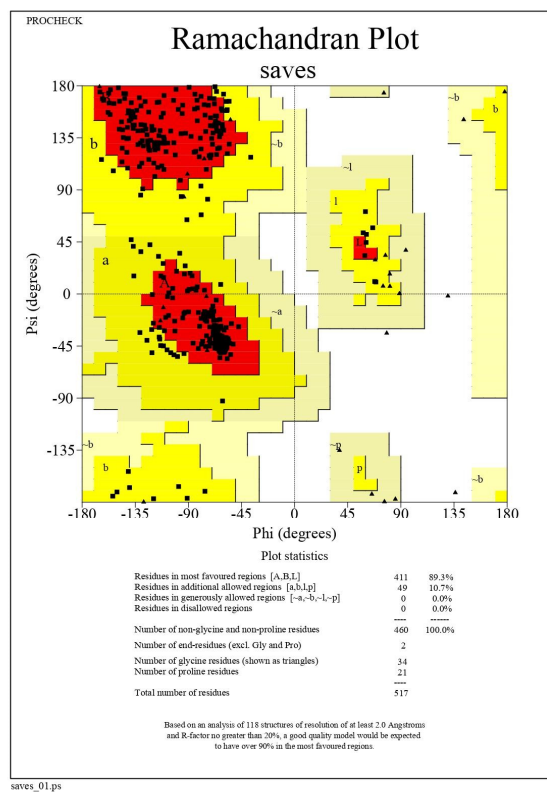

**sdiA**

Swiss Model template- PDB: 4y15.2.A, identity is 82%.

Selected model no: 1, chain A

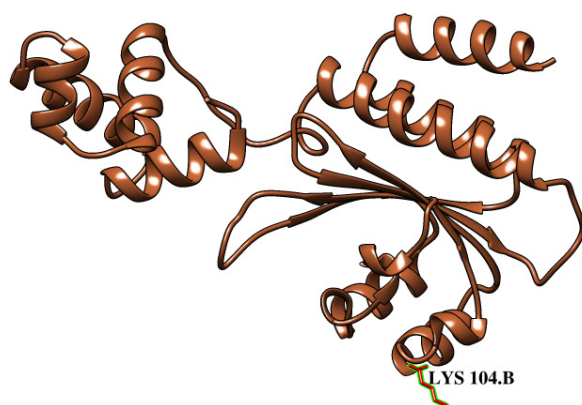

## Ramachandran Plot result:

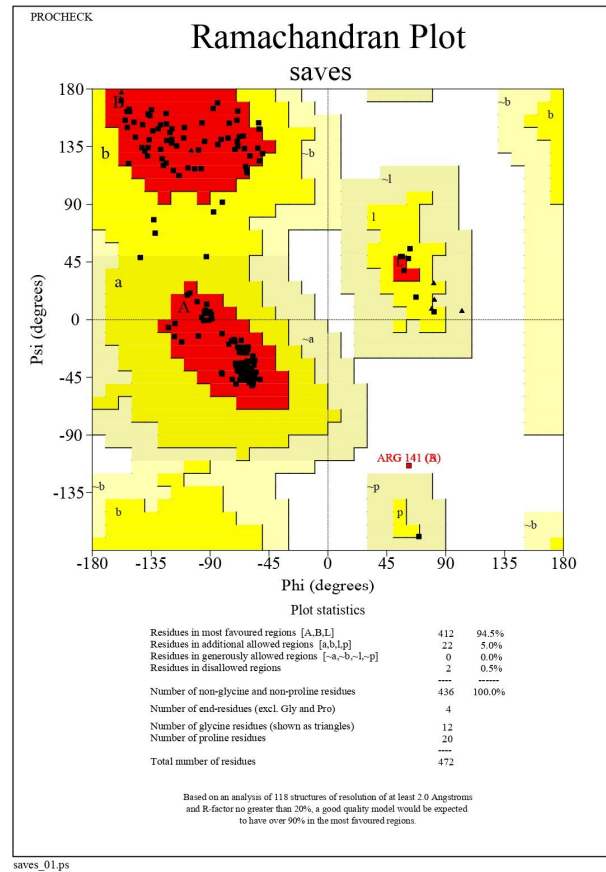

## nfsa

Swiss Model template-PDB: 1f5v.1.A, identity is 92%.

Selected model no: 1

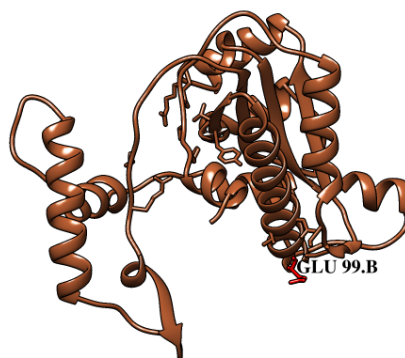

## Ramachandran Plot result:

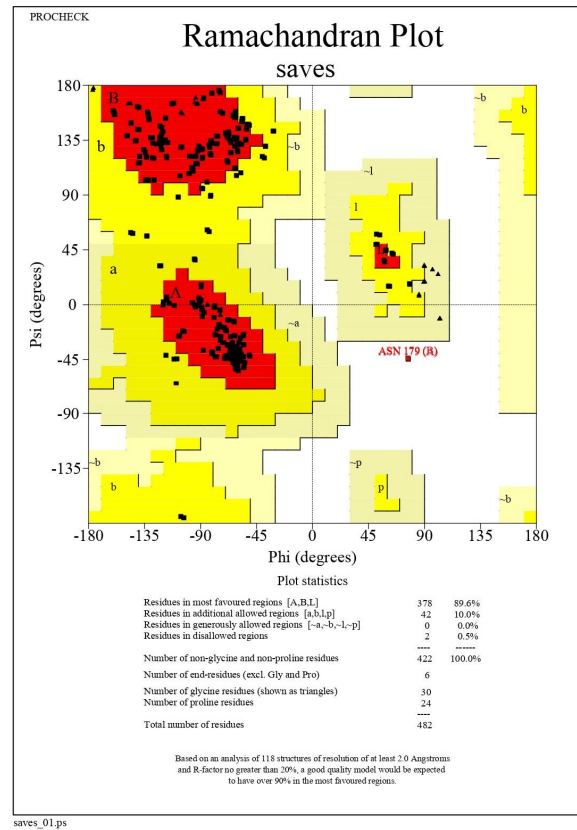

## Analysis of structure proteins with GWAS-based new variants.

### ppnn

Swiss Model template- PDB:2pmb.1.B, identity is 68%.

Selected model no: 1, chain A

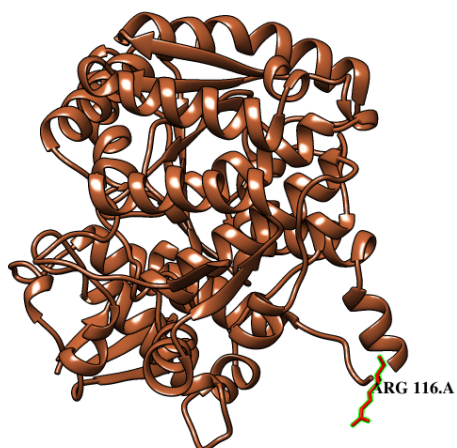

## Ramachandran Plot result:

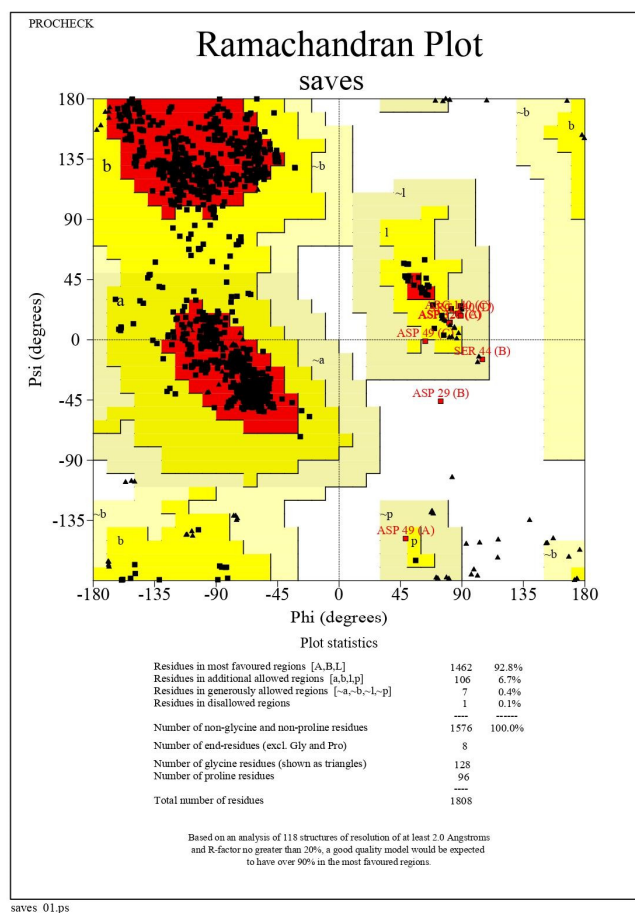

**bioH**

Swiss Model template-PDB:4nmw.1.A, identity is 100%

Selected model no: 1, chain A

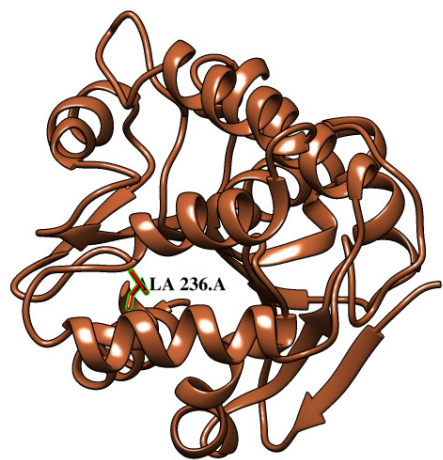

Ramachandran Plot result:

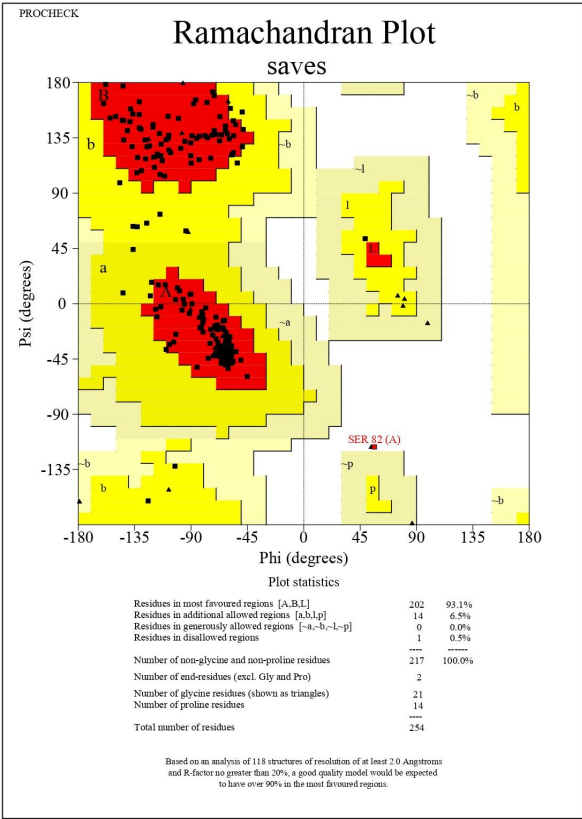

*mdtH*

Swiss-model- PDB:  
20.06%.

3wdo.1.A, identity is

Selected model no: 1

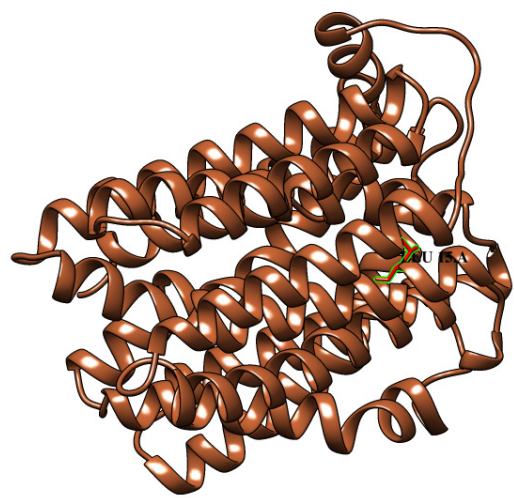

Ramachandran Plot result:

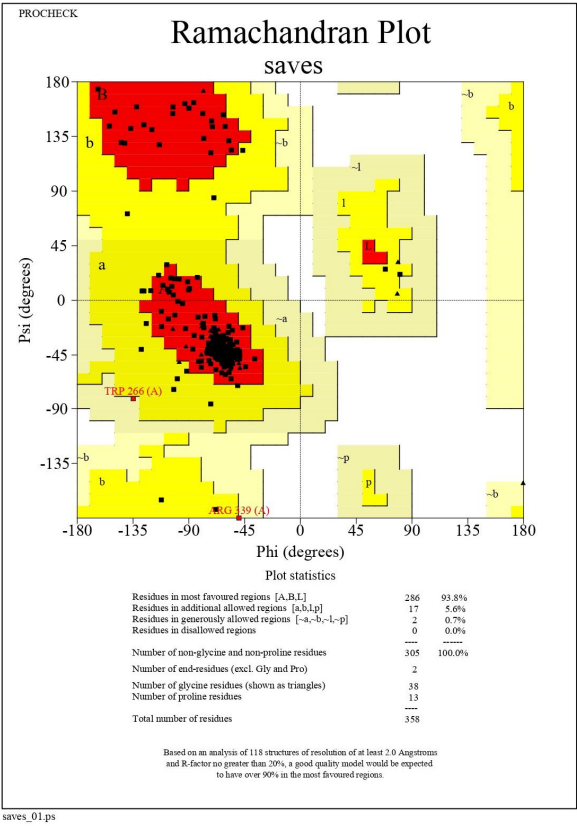

**qseC**

Template-  
71.43%.

PDB:

2kse.1.A, identity is



Selected model no: 3

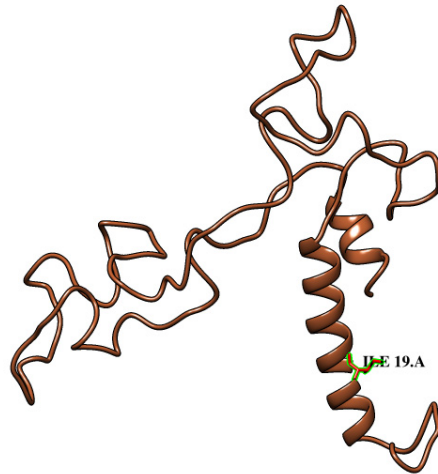

**Ramachandran Plot result:**

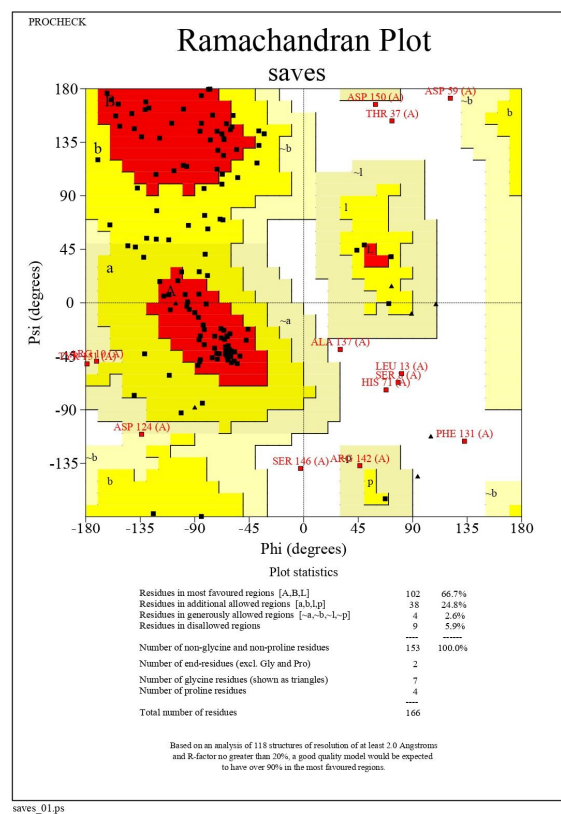

***purA***

Template- PDB: 2gcq.1.A , identity is 100%.

Selected model no: 1

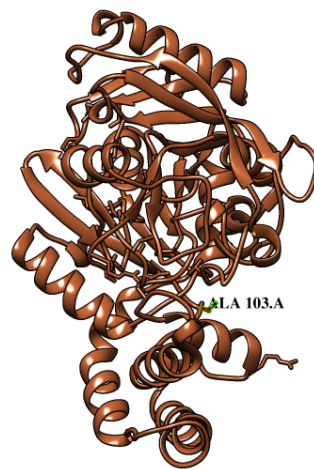

**Ramachandran Plot result:**

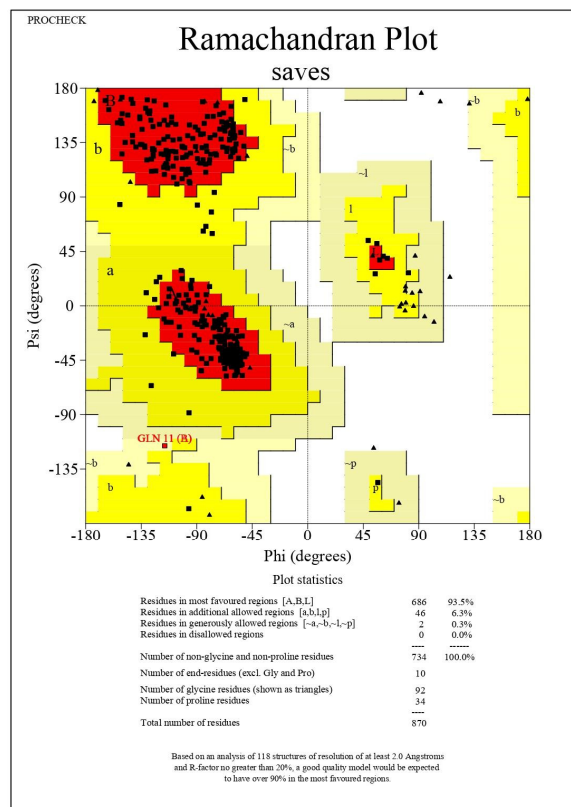

**wecA**

Template-identity is 33%

Selected model no: 1

PDB:5jmq.1.A,

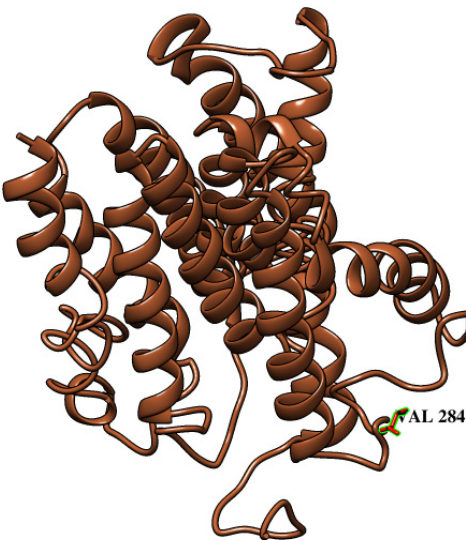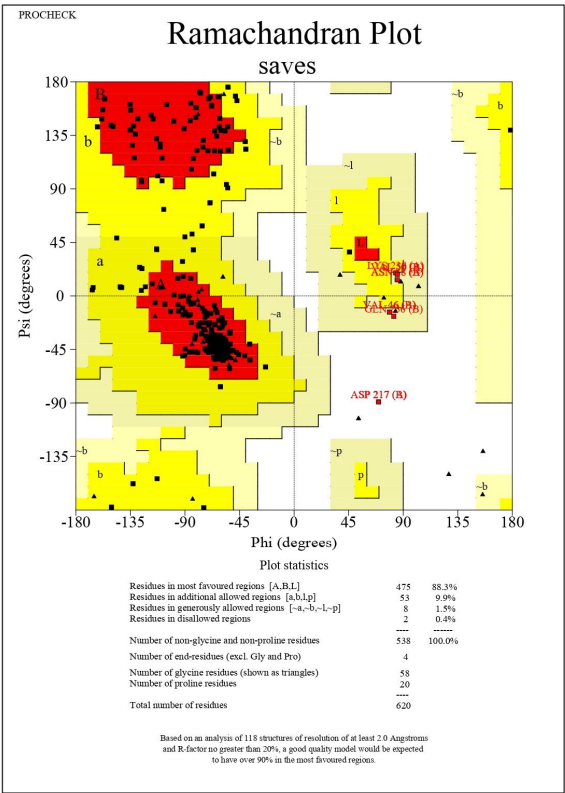

saves\_01.ps
