# Supplementary material for: WGS-Based Lineage and Antimicrobial Resistance Pattern of Salmonella Typhimurium Isolated during 2000–2017 in Peru
Source: Antibiotics (Basel). 2022 Aug 30;11(9):1170. doi: 10.3390/antibiotics11091170 (PMC9495214; doi:10.3390/antibiotics11091170)
Supplement: Supplementary file 1 [file antibiotics-11-01170-s001.zip › Supplementary Tables S1-S6.xlsx]

## Sheet: Table S1
Supplementary Table S1. Epidemiological data, antimicrobial resistance profile, sequencing, typification, and genomic structure analysis from 90 Salmonella Typhimurium strains.
Strain	Epidemiological data					Antimicrobial resistance profile by disk test										Phenotypic characterization			Sequencing information		Typification		Genomic structure analysis
																			Number acession				Chromosomal			Plasmid
	Year	Host	Resource	Institution/Hospital	City	Ampicillin (10 ug)	Chloramphenicol (30 ug)	Ciprofloxacin (5ug)	Trimethoprim-sulfamethoxazole (1.25/23.75 ug)	Cefotaxime (30 ug)	nalidixic acid (30 ug)	Amoxicillin-clavulanate (10/20 ug)	Nitrofurantoin (30 ug)	Tetracycline (30 ug)	Ceftazidime (30 ug)	not MDR	MDR	Pan sensitive	Genome	Reads	Serovar typification	ST	Coverage fold	# Contigs	# Proteins	Cluster	Size	Replicon and name plasmid	Mobility prediction	#Proteins	# AMR plamidial genes
FD01851477	2008	Human	Feces	DIRESA Trujillo	La Libertad	S	S	I	S	S	R	S	S	S	S	not MDR (1)	-	-	JABWKT000000000	ERR3637514	Enteritidis	19	42x	251	4973	AB460	89876	IncFIB(S)_P11	conjugative	112	0
																										AF598	38960	-	non-mobilizable	44	0
																										AA036	33581	-	conjugative	47	0
																										AC025	24654	-	conjugative	24	0
																										AC358	179719	IncFIB(pN55391)_12	mobilizable	187	1
																										AC663	16773	-	non-mobilizable	18	0
																										AF643	21745	-	non-mobilizable	32	0
																										AG835	12542	-	non-mobilizable	9	0
																										AA974	3769	rep_cluster_2131	mobilizable	3	0
FD01875451	2017	Environmental	Seafood	SANIPES	Lima	S	S	I	S	S	S	S	S	S	S	-	-	Pan sensitive	JABWIC000000000	ERR3638754	Typhimurium	19	61x	94	4570	AB460	93245	IncFIB(S)_P11	conjugative	115	0
FD01875450	2017	Environmental	Seafood	SANIPES	Lima	S	S	S	S	S	S	S	S	S	S	-	-	Pan sensitive	JABWID000000000	ERR3638753	Typhimurium	19	71x	100	4573	AB460	93264	IncFIB(S)_P11	conjugative	113	0
FD01852573	2013	Animal	Animal	Ica	Ica	S	S	I	S	S	S	S	S	S	S	-	-	Pan sensitive	JABWJE000000000	ERR3637734	Typhimurium	19	55x	98	4633	AB460	93298	IncFIB(S)_P11	conjugative	113	0
FD01852571	2013	Animal	Animal	Ica	Ica	S	S	I	S	S	S	S	S	S	S	-	-	Pan sensitive	JABWJF000000000	ERR3637732	Typhimurium	19	69x	103	4629	AB460		IncFIB(S)_P11	conjugative	112	0
FD01851390	2010	Human	Feces	Hospital Emergencias Pediátricas	Lima	S	S	I	S	S	S	S	S	S	S	-	-	Pan sensitive	JABWLB000000000	ERR3637431	Typhimurium	19	32x	77	4564	AB460	93256	IncFIB(S)_P11	conjugative	115	0
FD01851388	2010	Human	Blood	INEN	Lima	R	S	I	S	S	S	S	S	S	S	not MDR (1)	-	-	JABWLC000000000	ERR3637429	Typhimurium	19	35x	100	4557	AB460	91704	IncFIB(S)_P11	conjugative	114	0
																										AG835	4106	-	non-mobilizable	3	0
FD01848690	2001	Human	Feces	Hospital San Bartolomé	Lima	R	R	I	S	R	S	S	S	S	S	Not MDR(3)	-	-	JABWLO000000000	ERR3636780	Typhimurium	19	41x	153	4528	AB460	82809	IncFIB(S)_P11	conjugative	101	0
																										AG835	4080	-	non-mobilizable	3	0
FD01848678	2000	Human	Feces	Huaraz	Huaraz	S	S	S	S	S	S	S	S	S	S	-	-	Pan sensitive	JABWLW000000000	ERR3636768	Typhimurium	19	105x	105	4540	AB460	91383	IncFIB(S)_P11	conjugative	114	0
FD01848650	2000	Human	-	Apurimac	Apurimac	S	S	I	S	S	I	S	I	S	S	-	-	Pan sensitive	JABWMA000000000	ERR3636742	Typhimurium	19	43x	107	4630	AB460	92237	IncFIB(S)_P11	conjugative	112	0
FD01851478	2008	Human	Feces	DIRESA Trujillo	La Libertad	S	S	S	S	S	S	S	S	S	S	-	-	Pan sensitive	JABWKS000000000	ERR3637515	Typhimurium	19	48x	120	4565	AB460	90652	IncFIB(S)_P11	conjugative	112	0
FD01851425	2007	Environmental	Food	CENAN / INS	Lima	S	S	I	S	S	R	S	S	S	S	not MDR (1)	-	-	JABWKX000000000	ERR3637464	Typhimurium	19	21x	242	4551	AB460	88334	IncFIB(S)_P11	conjugative	108	0
																										AG835	3954	-	non-mobilizable	3	0
FD01851448	2008	Environmental	Food	INSN	Lima	S	S	S	S	S	S	S	S	S	S	-	-	Pan sensitive	JABWKV000000000	ERR3637485	Typhimurium	-	21x	382	4509	AF598	42779	-	non-mobilizable	46	0
																										AB460	87970	IncFIB(S)_P11	conjugative	108	0
																										AG835	6654	-	non-mobilizable	4	0
FD01852858	2010	Human	Blood	DISA Lima Ciudad	Lima	R	R	S	S	S	S	S	S	R	S	-	MDR	-	JABWIH000000000	ERR3638010	Typhimurium	19	30x	122	4551	AB460	90986	IncFIB(S)_P11	conjugative	111	0
																										AG835	4101	-	non-mobilizable	3	0
FD01851369	2008	Human	Feces	Madre de Dios	Madre de Dios	S	S	S	S	S	S	S	S	S	S	-	-	Pan sensitive	JABWLE000000000	ERR3637410	Typhimurium	-	37x	405	4455	AB460	83582	IncFIB(S)_P11	conjugative	104	0
																										AF598	19519	-	non-mobilizable	17	0
																										AA579	4110	-	mobilizable	5	0
																										AA163	3373	-	mobilizable	5	0
FD01848674	2000	Human	Feces	Cajamarca	Cajamarca	S	S	I	S	S	S	S	I	S	S	-	-	Pan sensitive	JABWLY000000000	ERR3636764	Typhimurium	19	22x	120	4557	AB460	90645	IncFIB(S)_P11	conjugative	109	0
FD01848677	2000	Human	Feces	Cajamarca	Cajamarca	S	S	I	S	R	S	S	S	S	I	not MDR (1)	-	-	JABWLX000000000	ERR3636767	Typhimurium	19	57x	115	4563	AB460	90365	IncFIB(S)_P11	conjugative	114	0
FD01848679	2000	Human	Feces	LIMA ESTE	Lima	S	S	I	S	R	S	S	S	S	S	not MDR (1)	-	-	JABWLV000000000	ERR3636769	Typhimurium	19	88x	134	4542	AB460	90720	IncFIB(S)_P11	conjugative	112	0
																										AG835	4126	-	non-mobilizable	3	0
FD01848681	2000	Human	Feces	Hospital Dos de Mayo	Lima	S	S	I	S	S	S	S	S	S	S	-	-	Pan sensitive	JABWLT000000000	ERR3636771	Typhimurium	19	32x	98	4598	AB460	72705	IncFIB(S)_P11	conjugative	90	0
FD01848684	2001	Human	Feces	DIRESA Trujillo	La Libertad	S	S	I	S	I	S	S	S	S	S	-	-	Pan sensitive	JABWLR000000000	ERR3636774	Typhimurium	19	25x	130	4525	AB460	70801	IncFIB(S)_P11	conjugative	88	0
																										AG835	4004	-	non-mobilizable	3	0
FD01848687	2001	Human	Feces	Huaraz	Huaraz	S	S	I	S	S	S	S	S	S	S	-	-	Pan sensitive	JABWLQ000000000	ERR3636777	Typhimurium	19	81x	132	4564	AB460	90557	IncFIB(S)_P11	conjugative	112	0
FD01848689	2001	Human	Feces	Hospital San Bartolomé	Lima	S	S	S	S	S	S	S	S	S	S	-	-	Pan sensitive	JABWLP000000000	ERR3636779	Typhimurium	19	45x	142	4587	AB460	90681	IncFIB(S)_P11	conjugative	101	0
																										AG835	4081	-	non-mobilizable	3	0
FD01848694	2001	Human	Feces	Moquegua	Moquegua	S	S	I	S	S	S	S	I	S	S	-	-	Pan sensitive	JABWLM000000000	ERR3636784	Typhimurium	19	112x	135	4535	AB460	89460	IncFIB(S)_P11	conjugative	112	0
FD01848696	2001	Human	Feces	Cusco	Cusco	S	S	I	S	S	S	S	S	S	S	-	-	Pan sensitive	JABWLL000000000	ERR3636786	Typhimurium	19	45x	211	4555	AB460	88641	IncFIB(S)_P11	conjugative	109	0
																										AG835	3959	-	non-mobilizable	4	0
FD01848699	2000	Human	Feces	Cajamarca	Cajamarca	S	S	S	S	S	S	S	S	S	S	-	-	Pan sensitive	JABWLJ000000000	ERR3636789	Typhimurium	19	49x	132	4592	AB460	90477	IncFIB(S)_P11	conjugative	112	0
																										AG835	4152	-	non-mobilizable	3	0
FD01848700	2000	Human	Feces	Cajamarca	Cajamarca	S	S	S	S	S	S	S	S	S	S	-	-	Pan sensitive	JABWLI000000000	ERR3636790	Typhimurium	19	60x	96	4592	AB460	90467	IncFIB(S)_P11	conjugative	113	0
FD01848702	2001	Human	Feces	Cusco	Cusco	S	S	I	S	S	S	S	S	S	S	-	-	Pan sensitive	JABWLG000000000	ERR3636793	Typhimurium	19	153x	124	4567	AB460	90533	IncFIB(S)_P11	conjugative	114	0
FD01852549	2017	Environmental	Food	UNMSM	Lima	S	S	I	S	S	R	S	S	S	S	not MDR (1)	-	-	JABWJH000000000	ERR3637710	Typhimurium	19	24x	209	4527	AB460	88604	IncFIB(S)_P11	conjugative	110	0
																										novel_20cfcf36	3338	-	mobilizable	5	0
																										AB042	2630	Col(pHAD28)_P13	mobilizable	3	1
FD01852548	2017	Human	Blood	Hospital Emergencias Pediátricas	Lima	S	S	I	S	S	I	S	S	R	S	not MDR (1)	-	-	JABWJI000000000	ERR3637709	Typhimurium	19	22x	236	4521	AB460	88309	IncFIB(S)_P11	conjugative	113	0
																										AF598	28842	-	non-mobilizable	30	0
																										novel_fbca2602	3338	-	mobilizable	4	0
																										AG835	4960	-	non-mobilizable	4	0
FD01852535	2016	Animal	Animal	Cusco	Cusco	S	S	I	S	S	S	S	S	S	I	-	-	Pan sensitive	JABWJL000000000	ERR3637699	Typhimurium	19	29x	157	4525	AB460	90723	IncFIB(S)_P11	conjugative	110	0
																										AB042	4771	Col(pHAD28)_P13	mobilizable	5	1
																										AG835	4096	-	non-mobilizable	3	0
																										novel_247e2252	3338	-	mobilizable	5	0
																										AD482	3282	rep_cluster_2350	mobilizable	4	0
FD01852587	2014	Human	Blood	INEN	Lima	S	S	I	S	S	R	S	S	S	S	not MDR (1)	-	-	JABWJA000000000	ERR3637748	Typhimurium	19	149x	87	4328	AB460	90834	IncFIB(S)_P11	conjugative	113	0
																										novel_53aafbbc	3338	-	mobilizable	4	0
FD01852865	2010	Human	Blood	Hospital Dos de Mayo	Lima	R	R	S	S	I	S	S	S	R	S	-	MDR	-	JABWIF000000000	ERR3638016	Typhimurium	19	34x	78	4651	AB460	92426	IncFIB(S)_P11	conjugative	113	0
																										AA627	58267	IncC_P5	mobilizable	79	3
FD01852558	2013	Human	Urine	DIRESA Callao	Callao	S	S	I	S	S	S	S	S	S	S	-	-	Pan sensitive	JABWJG000000000	ERR3637719	Typhimurium	19	22x	286	4779	AB460	93767	IncFIB(S)_P11	conjugative	116	0
																										AC358	102910	IncFIB(pN55391)_12	non-mobilizable	102	1
																										AH155	1707	-	non-mobilizable	2	0
FD01852857	2010	Human	Strain	DIRESA Huanuco	Huanuco	S	S	I	R	S	R	S	R	R	S	-	MDR	-	JABWII000000000	ERR3638009	Typhimurium	19	26x	97	4658	AB460	92385	IncFIB(S)_P11	conjugative	113	0
																										AA627	58267	IncC_P5	mobilizable	79	3
																										AG835	4152	-	non-mobilizable	3	0
FD01852530	2016	Human	Feces	INEN	Lima	S	S	I	R	S	R	S	I	S	S	not MDR (2)	-	-	JABWJN000000000	ERR3637694	Typhimurium	-	22x	329	4467	AB460	88137	IncFIB(S)_P11	conjugative	109	0
																										AG835	10147	-	non-mobilizable	9	0
FD01852684	2012	Human	Feces	Hospital San Bartolomé	Lima	S	S	S	S	S	S	S	S	I	S	-	-	Pan sensitive	JABWIS000000000	ERR3637845	Typhimurium	19	22x	70	4558	AB460	73693	IncFIB(S)_P11	conjugative	93	0
FD01851386	2010	Human	Blood	Hospital Emergencias Pediátricas	Lima	R	S	I	S	S	S	S	S	S	S	not MDR (1)	-	-	JABWLD000000000	ERR3637427	Typhimurium	19	34x	115	4527	AB460	90192	IncFIB(S)_P11	conjugative	112	0
FD01852799	2011	Human	Blood	INEN	Lima	S	S	S	S	S	S	S	S	S	S	-	-	Pan sensitive	JABWIJ000000000	ERR3637957	Typhimurium	19	70x	91	4636	AB460	92523	IncFIB(S)_P11	conjugative	113	0
FD01851392	2010	Human	Blood	Hospital Dos de Mayo	Lima	S	S	S	S	S	S	S	S	S	S	-	-	Pan sensitive	JABWKZ000000000	ERR3637433	Typhimurium	19	33x	98	4542	AB460	92260	IncFIB(S)_P11	conjugative	116	0
																										AD482	3282	rep_cluster_2350	mobilizable	4	0
FD01852462	2015	Human	Blood	INEN	Lima	S	S	I	S	S	S	S	S	S	S	-	-	Pan sensitive	JABWJW000000000	ERR3637632	Typhimurium	19	22x	132	4533	AB460	87923	IncFIB(S)_P11	conjugative	109	0
																										AG835	4048	-	non-mobilizable	3	0
FD01852461	2015	Human	Blood	INEN	Lima	S	S	I	S	S	R	S	S	S	S	not MDR (1)	-	-	JABWJX000000000	ERR3637631	Typhimurium	19	34x	130	4656	AA752	106532	IncFIB	non-mobilizable	129	0
																										AB460	90609	IncFIB(S)_P11	conjugative	113	0
																										AG835	4121	-	non-mobilizable	3	0
FD01851557	2006	Human	Feces	Huaraz	Huaraz	S	S	I	S	S	S	S	S	S	S	-	-	Pan sensitive	JABWJY000000000	ERR3637591	Typhimurium	19	23x	121	4622	AB460	91600	IncFIB(S)_P11	conjugative	113	0
																										AG835	4169	-	non-mobilizable	3	0
FD01852863	2010	Human	Blood	DIRESA Trujillo	La Libertad	S	S	S	S	S	S	S	S	S	S	-	-	Pan sensitive	JABWIG000000000	ERR3638014	Typhimurium	19	30x	69	4651	AB460	93410	IncFIB(S)_P11	conjugative	114	0
FD01852478	2015	Human	Feces	DIRESA Ancash	Ancash	S	S	S	S	S	S	S	S	S	S	-	-	Pan sensitive	JABWJU000000000	ERR3637647	Typhimurium	19	31x	122	4587	AB460	91202	IncFIB(S)_P11	conjugative	114	0
																										AA162	4654	ColRNAI_rep_cluster_1857,rep_cluster_2370	mobilizable	5	0
																										AB060	3165	rep_cluster_2373	non-mobilizable	5	0
FD01851391	2010	Human	Blood	DISA Lima Ciudad	Lima	S	S	S	S	S	S	S	S	S	S	-	-	Pan sensitive	JABWLA000000000	ERR3637432	Typhimurium	19	27x	62	4540	AB460	93439	IncFIB(S)_P11	conjugative	114	0
FD01851333	2009	Human	Feces	Ancash	Ancash	I	S	I	S	S	S	S	S	S	S	-	-	Pan sensitive	NC_003197	ERR3637374	Typhimurium	19	34x	1	4571	AB460	93939	IncFIB(S)_P11	conjugative	117	0
FD01851320	2009	Environmental	Food	CENAN / INS	Lima	S	S	I	S	S	S	R	S	S	S	not MDR (1)	-	-	JABWLF000000000	ERR3637361	Typhimurium	19	36x	70	4515	AB460	73593	IncFIB(S)_P11	conjugative	93	0
FD01852545	2017	Human	Blood	INEN	Lima	S	S	S	S	S	S	S	S	S	S	-	-	Pan sensitive	JABWJJ000000000	ERR3637707	Typhimurium	-	21x	344	4529	AB460	88578	IncFIB(S)_P11	conjugative	113	0
																										AF598	15872	-	non-mobilizable	16	0
																										AG835	10316	-	non-mobilizable	8	0
																										AB042	2058	Col(pHAD28)_P13	non-mobilizable	3	1
FD01852531	2016	Human	Feces	Hospital Emergencias Pediátricas	Lima	S	S	S	S	S	S	S	S	S	S	-	-	Pan sensitive	JABWJM000000000	ERR3637695	Typhimurium	19	30x	177	4540	AB460	89461	IncFIB(S)_P11	conjugative	111	0
																										AG835	2338	-	non-mobilizable	2	0
FD01851528	2006	Human	Feces	HOSP. HIPOLITO UNANUE	Lima	S	S	I	S	I	S	S	S	S	S	-	-	Pan sensitive	JABWKG000000000	ERR3637562	Typhimurium	19	24x	147	4548	AB460	90977	IncFIB(S)_P11	conjugative	114	0
FD01851503	2005	Human	Feces	DIRESA Trujillo	La Libertad	S	S	I	S	S	S	S	R	S	S	not MDR (1)	-	-	JABWKN000000000	ERR3637537	Typhimurium	19	21x	126	4523	AB460	92467	IncFIB(S)_P11	conjugative	113	0
																										AG835	4128	-	non-mobilizable	3	0
FD01851502	2005	Human	Feces	Hospital San Bartolomé	Lima	S	S	I	S	S	S	S	S	S	S	-	-	Pan sensitive	JABWKO000000000	ERR3637536	Typhimurium	19	25x	107	4533	AB460	91766	IncFIB(S)_P11	conjugative	115	0
																										AG835	4116	-	non-mobilizable	3	0
FD01848615	2005	Human	Feces	Hospital San Bartolomé	Lima	R	S	I	R	S	S	S	S	S	S	not MDR (2)	-	-	JABWMC000000000	ERR3636710	Typhimurium	19	24x	90	4546	AB460	92305	IncFIB(S)_P11	conjugative	113	0
FD01848613	2005	Human	Feces	DIRESA Trujillo	La Libertad	S	S	S	S	S	S	S	S	S	S	-	-	Pan sensitive	JABWMD000000000	ERR3636708	Typhimurium	19	45x	92	4546	AB460	92318	IncFIB(S)_P11	conjugative	113	0
FD01848616	2005	Human	Feces	LIMA CIUDAD	Lima	S	S	I	S	S	S	S	R	S	S	not MDR (1)	-	-	JABWMB000000000	ERR3636711	Typhimurium	19	62x	96	4553	AB460	92617	IncFIB(S)_P11	conjugative	116	0
FD01851499	2005	Human	Feces	LRR Chiclayo	Lambayeque	R	I	I	S	S	S	S	R	S	S	not MDR (2)	-	-	JABWKR000000000	ERR3637533	Typhimurium	19	25x	134	4533	AB460	90683	IncFIB(S)_P11	conjugative	115	0
FD01851500	2005	Human	Feces	Puno	Puno	S	S	I	S	S	S	S	R	S	S	not MDR (1)	-	-	JABWKQ000000000	ERR3637534	Typhimurium	19	21x	148	4540	AB460	90986	IncFIB(S)_P11	conjugative	112	0
FD01851501	2005	Human	Feces	Puno	Puno	S	S	S	S	S	S	S	S	S	S	-	-	Pan sensitive	JABWKP000000000	ERR3637535	Typhimurium	19	28x	116	4542	AB460	90701	IncFIB(S)_P11	conjugative	113	0
																										AG835	4148	-	non-mobilizable	3	0
FD01851506	2005	Human	Feces	Direccion de Salud I	Callao	S	S	S	S	S	S	S	I	S	S	-	-	Pan sensitive	JABWKM000000000	ERR3637540	Typhimurium	19	21x	186	4479	AB460	85690	IncFIB(S)_P11	conjugative	108	0
																										AG835	4065	-	non-mobilizable	4	0
FD01851509	2005	Human	Feces	Direccion de Salud I	Callao	S	S	I	S	S	S	S	R	S	S	not MDR (1)	-	-	JABWKL000000000	ERR3637543	Typhimurium	19	20x	148	4548	AB460	91667	IncFIB(S)_P11	conjugative	115	0
																										AG835	2120	-	non-mobilizable	3	0
FD01851516	2005	Human	Feces	LRR Chiclayo	Lambayeque	S	S	I	S	S	S	S	R	S	S	not MDR (1)	-	-	JABWKK000000000	ERR3637550	Typhimurium	19	25x	99	4531	AB460	90709	IncFIB(S)_P11	conjugative	112	0
FD01851517	2005	Human	Feces	LRR Chiclayo	Lambayeque	S	S	I	S	S	S	S	S	S	S	-	-	Pan sensitive	JABWKJ000000000	ERR3637551	Typhimurium	19	23x	101	4537	AB460	92236	IncFIB(S)_P11	conjugative	116	0
FD01851519	2005	Human	Feces	Huaraz	Huaraz	S	S	I	S	S	S	S	R	S	S	not MDR (1)	-	-	JABWKI000000000	ERR3637553	Typhimurium	19	27x	116	4527	AB460	84450	IncFIB(S)_P11	conjugative	115	0
																										AG835	4073	-	non-mobilizable	3	0
FD01851527	2006	Human	Strain	Direccion de Salud I	Callao	S	S	I	S	S	S	S	R	S	S	not MDR (1)	-	-	JABWKH000000000	ERR3637561	Typhimurium	19	29x	153	4602	AB460	90628	IncFIB(S)_P11	conjugative	113	0
FD01851529	2006	Human	Feces	Huaraz	Huaraz	S	S	S	S	S	S	S	R	S	S	not MDR (1)	-	-	JABWKF000000000	ERR3637563	Typhimurium	19	24x	161	4531	AB460	90741	IncFIB(S)_P11	conjugative	113	0
																										AG835	4121	-	non-mobilizable	3	0
FD01851530	2006	Human	Blood	INEN	Lima	S	S	I	S	I	S	S	R	S	S	not MDR (1)	-	-	JABWKE000000000	ERR3637564	Typhimurium	19	23x	195	4518	AB460	86282	IncFIB(S)_P11	conjugative	108	0
																										AG835	4070	-	non-mobilizable	3	0
FD01851532	2006	Environmental	Food	Laboratorio INTEVET S.A	Lima	S	S	I	S	S	S	S	S	S	S	-	-	Pan sensitive	JABWKD000000000	ERR3637566	Typhimurium	19	28x	83	4511	AB460	92489	IncFIB(S)_P11	conjugative	112	0
FD01851535	2006	Environmental	Food	Laboratorio INTEVET S.A	Lima	S	S	I	S	S	S	S	S	S	S	-	-	Pan sensitive	JABWKC000000000	ERR3637569	Typhimurium	19	26x	130	4521	AB460	90724	IncFIB(S)_P11	conjugative	113	0
																										AG835	4107	-	non-mobilizable	3	0
FD01851536	2006	Environmental	Food	Laboratorio INTEVET S.A	Lima	S	S	S	S	S	S	S	S	S	S	-	-	Pan sensitive	JABWKB000000000	ERR3637570	Typhimurium	19	29x	164	4541	AB460	90742	IncFIB(S)_P11	conjugative	116	0
																										AG835	4119	-	non-mobilizable	3	0
FD01851538	2006	Human	Blood	LIMA	Lima	S	S	I	S	S	S	S	R	S	S	not MDR (1)	-	-	JABWKA000000000	ERR3637572	Typhimurium	19	23x	322	4534	AB460	89585	IncFIB(S)_P11	conjugative	112	0
																										AG835	4054	-	non-mobilizable	3	0
FD01851541	2006	Human	Feces	Hospital Santa Maria Del Socorro	Ica	R	S	I	S	S	S	S	I	S	S	not MDR (1)	-	-	JABWJZ000000000	ERR3637575	Typhimurium	19	23x	157	4570	AB460	90581	IncFIB(S)_P11	conjugative	115	0
																										AG835	4077	-	non-mobilizable	3	0
FD01846422	2017	Human	Strain	Hospital Emergencias Pediátricas	Lima	S	R	I	R	S	R	S	S	R	S	-	4 MDR	-	JABWMF000000000	ERR3635362	Typhimurium	19	57x	148	5034	AA738	325668	IncHI2_P1	conjugative	375	8
																										AB460	37679	IncFIB(S)_P11	conjugative	46	0
																										AC027	26676	-	non-mobilizable	35	0
																										AA476	5249	-	non-mobilizable	6	0
																										AG658	4980	P6	non-mobilizable	8	1
FD01872670	2017	Human	Feces	Hospital Emergencias Pediátricas	Lima	S	R	I	R	S	R	S	S	R	S	-	4 MDR	-	JABWIE000000000	ERR3638199	Typhimurium	19	50x	149	5104	AB460	96831	IncFIB(S)_P11	conjugative	117	1
																										AA738	203997	IncHI2_P1	conjugative	219	7
																										AA372	71350	IncI2_P3	conjugative	88	4
																										AA474	97871	IncI-gamma/K1	conjugative	105	0
																										AG658	4980	P6	non-mobilizable	8	1
FD01846446	2017	Human	Strain	Hospital Emergencias Pediátricas	Lima	S	S	S	S	S	S	S	S	S	S	-	-	Pan sensitive	JABWME000000000	ERR3635366	Typhimurium	19	52x	177	5028	AA738	199754	IncHI2_P1	conjugative	215	4
																										AA372	63816	IncI2_P3	conjugative	79	1
																										AB460	94337	IncFIB(S)_P11	conjugative	118	1
																										AC027	26560	-	non-mobilizable	34	0
																										AA476	5222	-	non-mobilizable	6	0
																										AD312	9180	P8	non-mobilizable	13	7
																										AG658	4980	P6	non-mobilizable	8	2
FD01852492	2015	Human	Feces	LRR Apurimac	Apurimac	S	S	I	S	S	R	S	R	S	S	not MDR (2)	-	-	JABWJS000000000	ERR3637661	Typhimurium	19	24x	188	4712	AA474	38471	IncI-gamma/K1_P7	mobilizable	111	2
																										AA174	33950	IncN	conjugative	49	0
																										AD158	13755	-	non-mobilizable	51	0
																										AG456	6863	P4	mobilizable	22	4
																										AB447	5463	Col156	mobilizable	3	0
																										AA979	5299	-	non-mobilizable	6	0
																										AG658	4532	P6	mobilizable	9	1
																										AA524	4073	rep_cluster_1778	mobilizable	5	0
																										AA579	2710	-	mobilizable	4	0
																										AB042	2699	Col(pHAD28)_P13	mobilizable	2	1
																										AB038	2710	-	mobilizable	5	0
FD01852637	2015	Human	Feces	Hospital Emergencias Pediátricas	Lima	R	S	R	S	S	R	S	S	R	S	-	4 MDR	-	JABWIW000000000	ERR3637798	Typhimurium	19	25x	101	4554	AA473	85228	IncI-gamma/K1	conjugative	91	0
																										AA174	30083	IncFIB,IncFII	mobilizable	35	0
																										AC302	18950	-	non-mobilizable	23	0
																										AB042	3071	rep_cluster_2335	mobilizable	4	0
FD01852500	2016	Human	Feces	INSN	Lima	R	S	I	S	I	R	I	S	R	I	-	MDR	-	JABWJQ000000000	ERR3637669	Typhimurium	19	22x	289	4493	AF598	26078	-	non-mobilizable	25	0
																										novel_f6e6202	14936	IncFII	mobilizable	18	0
																										AG456	11792	P4	non-mobilizable	18	2
																										AA979	5463	Col156	mobilizable	7	0
																										AG799	10225	IncFIB	non-mobilizable	13	0
																										AA174	16985	P15	non-mobilizable	23	1
																										AG835	3957	-	non-mobilizable	4	0
																										AA675	1417	P16	non-mobilizable	2	1
FD01852499	2016	Human	Feces	Hospital Emergencias Pediátricas	Lima	R	S	R	S	S	R	R	S	R	S	-	5 MDR	-	JABWJR000000000	ERR3637668	Typhimurium	19	20x	314	4499	AA174	19043	IncFII	non-mobilizable	23	0
																										AF598	15911	-	non-mobilizable	16	0
																										AG456	12298	P4	non-mobilizable	17	2
																										AA315	15686	-	mobilizable	18	0
																										AG600	4879	-	non-mobilizable	6	0
																										AB042	3071	Col(pHAD28)_P13	mobilizable	4	1
																										AG835	3698	-	non-mobilizable	3	0
FD01852484	2015	Human	Strain	Hospital Emergencias Pediátricas	Lima	I	R	I	R	S	R	S	S	R	S	-	4 MDR	-	JABWJT000000000	ERR3637653	Typhimurium	19	25x	186	4613	AA474	100130	IncI-gamma/K1_P7	conjugative	115	2
																										AA174	19386	IncFII	non-mobilizable	21	0
																										AG456	13839	P4	non-mobilizable	22	3
																										AA979	5463	Col156	mobilizable	6	0
																										AG658	5299	P6	non-mobilizable	9	2
																										AG799	8999	IncFIB	mobilizable	13	0
																										AG835	4145	-	non-mobilizable	3	0
																										AA579	4073	rep_cluster_1778	mobilizable	3	0
																										AB042	2622	rep_cluster_2335	mobilizable	2	0
FD01852476	2015	Human	Feces	INSN	Lima	R	S	I	S	R	R	I	S	R	R	-	5 MDR	-	JABWJV000000000	ERR3637645	Typhimurium	19	29x	182	4587	AA474	78722	IncI-gamma/K1_P7	conjugative	81	1
																										AA174	32698	IncFIB,IncFII	mobilizable	42	0
																										AG456	11880	P4	non-mobilizable	18	2
																										AG600	9260	-	non-mobilizable	11	0
																										AA979	5463	rep_cluster_2131	mobilizable	6	0
																										AA579	4073	rep_cluster_1778	mobilizable	2	0
																										AB042	3071	Col(pHAD28)_P13	mobilizable	4	1
																										AG835	2407	-	non-mobilizable	3	0
																										AA675	2059	P16	non-mobilizable	3	1
FD01852792	2011	Human	Feces	Hospital San Bartolomé	Lima	S	S	S	S	S	S	S	S	S	S	-	-	Pan sensitive	JABWIK000000000	ERR3637951	Typhimurium	19	46x	194	4667	AB460	90834	IncFIB(S)_P11	conjugative	112	0
FD01852748	2011	Human	Blood	INEN	Lima	R	S	I	S	R	S	S	S	S	S	not MDR (2)	-	-	JABWIL000000000	ERR3637909	Typhimurium	19	77x	140	4577	AB460	18567	IncFIB(S)_P11	non-mobilizable	112	0
																										AA473	52710	IncI1-I(Alpha)_P14	non-mobilizable	54	2
																										AD479	5728	rep_cluster_2335	non-mobilizable	6	0
FD01852626	2014	Human	Feces	INSN	Lima	S	S	I	S	S	S	S	S	S	S	-	-	Pan sensitive	JABWIY000000000	ERR3637787	Typhimurium	19	20x	154	4583	AB460	87868	IncFIB(S)_P11	conjugative	107	0
																										AG835	2322	-	non-mobilizable	3	0
FD01852600	2014	Human	Blood	INEN	Lima	S	S	I	S	I	S	S	S	S	S	-	-	Pan sensitive	JABWIZ000000000	ERR3637761	Typhimurium	19	22x	168	4717	AA473	115700	IncI1-I(Alpha)_P14	conjugative	121	2
																										AB460	88705	IncFIB(S)_P11	conjugative	112	0
																										AD342	5274	Col(Ye4449)	mobilizable	6	0
FD01852539	2016	Human	Feces	Hospital Emergencias Pediátricas	Lima	R	R	I	R	S	R	S	S	R	S	-	5 MDR	-	JABWJK000000000	ERR3637701	Typhimurium	19	33x	258	4664	AB460	93051	IncFIB(S)_P11	conjugative	114	1
																										AA551	31677	IncN	conjugative	38	0
																										AB042	2699	Col(pHAD28)_P13	mobilizable	3	1
																										AG835	3869	-	non-mobilizable	3	0
FD01851394	2010	Human	Feces	Hospital San Bartolomé	Lima	S	S	I	S	S	S	S	S	R	S	not MDR (1)	-	-	JABWKY000000000	ERR3637435	Typhimurium	19	22x	161	4670	AB460	87459	IncFIB(S)_P11	conjugative	108	0
																										AA551	33014	IncN	conjugative	41	0
																										AB595	6189	P2	mobilizable	7	3
																										AG835	4031	-	non-mobilizable	3	0
FD01852582	2013	Human	Feces	Hospital Emergencias Pediátricas	Lima	S	S	I	S	S	S	S	S	R	S	not MDR (1)	-	-	JABWJD000000000	ERR3637743	Typhimurium	19	22x	80	4642	AB460	93218	IncFIB(S)_P11	conjugative	114	0
																										AA551	38241	IncN_P17	conjugative	45	2
																										AB595	6189	P2	mobilizable	6	3
FD01852523	2016	Human	Feces	INEN	Lima	S	S	I	S	S	R	S	S	R	S	not MDR (2)	-	-	JABWJO000000000	ERR3637688	Typhimurium	19	27x	172	4670	AB460	91149	IncFIB(S)_P11	conjugative	112	1
																										AA551	33127	IncN	conjugative	42	0
																										AB042	2699	Col(pHAD28)_P13	mobilizable	3	1
FD01852653	2012	Human	Blood	DISA Lima Ciudad	Lima	S	S	I	S	S	R	S	S	R	S	not MDR (2)	-	-	JABWIU000000000	ERR3637815	Typhimurium	19	21x	139	4668	AB460	90931	IncFIB(S)_P11	conjugative	112	0
																										AA551	39058	IncN	conjugative	47	0
																										AB042	2699	rep_cluster_2335	mobilizable	2	0
FD01852647	2015	Human	Blood	INEN	Lima	S	S	S	S	S	S	S	S	R	S	not MDR (1)	-	-	JABWIV000000000	ERR3637808	Typhimurium	19	22x	133	4501	AB447	11799	rep_cluster_2350	mobilizable	9	0
																										AB595	8296	rep_cluster_2335	mobilizable	9	0

## Sheet:  Table S2
Supplementary Table S2. Epidemiological data, ST, and BAPS analysis from 140 Salmonella Typhimurium strains.
Strain	Country	Continent	Host	ST	BAPS
UGA10	Kenya	Africa	Human	313	10
UGA14	Kenya	Africa	Human	313	10
BKQZM9	Malawi	Africa	Human	313	10
D23580	Malawi	Africa	Human	313	10
RSE04	Rwanda	Africa	Pig	19	5
WG49	South_Africa	Africa	NA	19	7
D545	Tunisia	Africa	Human	19	5
GR560	Tunisia	Africa	Human	19	2
ST53	China	Asia	Human	19	7
ZJUJY	China	Asia	Human	19	7
138736	Israel	Asia	Human	19	4
L-3835	Japan	Asia	Human	34	6
T000240	Japan	Asia	NA	19	7
NCCP_16207	South_Korea	Asia	Human	19	4
ST1120	South_Korea	Asia	Pig	19	7
R17.1451	Taiwan	Asia	Human	19	8
Wartortle	Taiwan	Asia	Human	19	1
10ST07093	Australia	Australia	Human	19	1
AUSMDU00010529	Australia	Australia	Human	19	1
SS2017	Belarus	Australia	NA	19	1
S10	Denmark	Europe	Pig	19	7
S23	Denmark	Europe	Pig	34	6
2012CEB432SAL	France	Europe	Feed	34	6
CNR1776	France	Europe	Human	34	6
SARA13	France	Europe	NA	19	1
SL1344RX	Ireland	Europe	Bos taurus	19	1
UZH_N17_0343	Switzerland	Europe	Human	19	9
FRANCEb	United Kingdom	Europe	Human	19	4
DA34821	Germany	Europe	Human	34	6
SV68791	Spain	Europe	Poultry	19	4
DA34827	Sweden	Europe	Human	19	4
DA34837	Sweden	Europe	Human	34	6
16425992	Canada	North_America	Human	19	4
11A0003616	Canada	North_America	Human	19	4
LOL16001	Costa Rica	North_America	Turtle	19	7
SO2	Mexico	North_America	Human	302	11
SOHS_02-68	Mexico	North_America	Human	302	11
SAP17-7699	USA	North_America	Human	19	19
SAP17-8290	USA	North_America	Human	19	4
ARIM-STM1601-07	ArgentiNA	South_America	Hare	19	7
CFSAN033880	Brazil	South_America	Human	19	1
CFSAN033890	Brazil	South_America	Human	19	8
ST-08	Chile	South_America	Environmental	19	17
ST-11	Chile	South_America	Environmental	19	12
ST-12	Chile	South_America	Environmental	19	12
GMR-S-1257	Colombia	South_America	Human	34	6
GMR-S-356.16	Colombia	South_America	Human	34	6
UK-1	United Kingdom	Europe	Human	19	7
98346	Israel	Asia	Human	19	4
LT2	USA	North_America	NA	19	7
FD01875451	Peru	South_America	Environmental	19	17
FD01875450	Peru	South_America	Environmental	19	17
FD01852865	Peru	South_America	Human	19	15
FD01852863	Peru	South_America	Human	19	14
FD01852857	Peru	South_America	Human	19	15
FD01852792	Peru	South_America	Human	19	3
FD01852748	Peru	South_America	Human	19	3
FD01852684	Peru	South_America	Human	19	15
FD01852653	Peru	South_America	Human	19	2
FD01852647	Peru	South_America	Human	19	2
FD01852637	Peru	South_America	Human	19	8
FD01852626	Peru	South_America	Human	19	3
FD01852600	Peru	South_America	Human	19	3
FD01852587	Peru	South_America	Human	19	16
FD01852573	Peru	South_America	Animal	19	17
FD01852571	Peru	South_America	Animal	19	17
FD01852558	Peru	South_America	Human	19	15
FD01852549	Peru	South_America	Environmental	19	16
FD01852548	Peru	South_America	Human	19	16
FD01852545	Peru	South_America	Human	NA	13
FD01852535	Peru	South_America	Animal	19	16
FD01852531	Peru	South_America	Human	19	13
FD01852530	Peru	South_America	Human	NA	15
FD01852523	Peru	South_America	Human	19	2
FD01852500	Peru	South_America	Human	19	8
FD01852499	Peru	South_America	Human	19	8
FD01852484	Peru	South_America	Human	19	8
FD01852478	Peru	South_America	Human	19	14
FD01852476	Peru	South_America	Human	19	8
FD01852462	Peru	South_America	Human	19	14
FD01852461	Peru	South_America	Human	19	14
FD01851557	Peru	South_America	Human	19	14
FD01851528	Peru	South_America	Human	19	13
FD01851503	Peru	South_America	Human	19	13
FD01851502	Peru	South_America	Human	19	13
FD01851478	Peru	South_America	Human	19	17
FD01851391	Peru	South_America	Human	19	14
FD01851390	Peru	South_America	Human	19	17
FD01851388	Peru	South_America	Human	19	17
FD01851386	Peru	South_America	Human	19	15
FD01851333	Peru	South_America	Human	19	14
FD01851320	Peru	South_America	Environmental	19	14
FD01848690	Peru	South_America	Human	19	17
FD01848678	Peru	South_America	Human	19	17
FD01848650	Peru	South_America	Human	19	17
FD01848615	Peru	South_America	Human	19	13
FD01848613	Peru	South_America	Human	19	13
FD01846446	Peru	South_America	Human	19	9
FD01848674	Peru	South_America	Human	19	17
FD01848677	Peru	South_America	Human	19	17
FD01848679	Peru	South_America	Human	19	17
FD01848681	Peru	South_America	Human	19	17
FD01848684	Peru	South_America	Human	19	17
FD01848687	Peru	South_America	Human	19	17
FD01848689	Peru	South_America	Human	19	17
FD01848694	Peru	South_America	Human	19	17
FD01848696	Peru	South_America	Human	19	17
FD01848699	Peru	South_America	Human	19	17
FD01848700	Peru	South_America	Human	19	17
FD01848702	Peru	South_America	Human	19	17
FD01848616	Peru	South_America	Human	19	13
FD01851499	Peru	South_America	Human	19	13
FD01851500	Peru	South_America	Human	19	13
FD01851501	Peru	South_America	Human	19	13
FD01851506	Peru	South_America	Human	19	13
FD01851509	Peru	South_America	Human	19	13
FD01851516	Peru	South_America	Human	19	13
FD01851517	Peru	South_America	Human	19	13
FD01851519	Peru	South_America	Human	19	13
FD01851527	Peru	South_America	Human	19	13
FD01851529	Peru	South_America	Human	19	13
FD01851530	Peru	South_America	Human	19	13
FD01851532	Peru	South_America	Environmental	19	13
FD01851535	Peru	South_America	Environmental	19	13
FD01851536	Peru	South_America	Environmental	19	13
FD01851538	Peru	South_America	Human	19	13
FD01851541	Peru	South_America	Human	19	13
FD01851425	Peru	South_America	Environmental	19	17
FD01851448	Peru	South_America	Environmental	NA	17
FD01851477	Peru	South_America	Human	19	18
FD01851369	Peru	South_America	Human	NA	17
FD01851392	Peru	South_America	Human	19	14
FD01851394	Peru	South_America	Human	19	2
FD01852858	Peru	South_America	Human	19	17
FD01852799	Peru	South_America	Human	19	15
FD01852582	Peru	South_America	Human	19	2
FD01852492	Peru	South_America	Human	19	8
FD01852539	Peru	South_America	Human	NA	2
FD01846422	Peru	South_America	Human	19	9
FD01872670	Peru	South_America	Human	19	9

## Sheet: Table S3
Supplementary Table S3. Genotypic and phenotypic resistance profiles of the 90 Salmonella Typhimurium strains.
Resistance Mechanism	Inactivation	Inactivation	Efflux	Inactivation	Target replacement	Efflux	Efflux	Inactivation	Target alteration	Inactivation	Efflux	N/A	Inactivation	Efflux	Target alteration	Target protection	Inactivation	Efflux	Efflux	Efflux	Target alteration	Target alteration	Inactivation	Efflux	Inactivation		Inactivation	Inactivation	Target replacement	Target replacement	Efflux	N/A	Inactivation	Efflux	Efflux	Target replacement	Target replacement	Inactivation	Inactivation	Inactivation	Inactivation	Inactivation	Inactivation	Inactivation	Inactivation	Inactivation	Inactivation	Inactivation	Inactivation
Drug class	Aminoglycoside		Aminocoumarin and Aminoglycoside		aminocoumarin		Multiclass						Beta-lactams		Bacitracin	Fluoroquinolone								Nitrofurantoin			Beta-lactams and phenicol				Nitroimidazole	Microcin	Sulfonamide	Tetracycline	Lincosamide	Thrimetropim		Aminoglycoside		Multiclass	Aminoglycoside	Aminoglycoside	Aminoglycoside	Aminoglycoside	Aminoglycoside	Aminoglycoside	Aminoglycoside	Aminoglycoside	bleomycin
Strain	AMR chromossomal genes																																								AMR Mobile genes
	aac(6')-Iaa	kdpE	baeR	cpxA	mdtB	mdtC	acrB2	sdiA	tolC	H-NS	acrB1	marA	ompA	ampH	bacA	mdtK	CRP	emrA	emrB	emrR	gyrB	parC	gyrA	nfsA	nfsB	ribC	golS	mdsA	mdsB	mdsC	msbA	yojI	sul2	tetA	linG	dfrA1	dfrA12	aadA2	aph(3')-Ia	KpnH	aac(3)-IIe	aac(6')-Ian	ant(3'')-IIa	aph(3'')-Ib	aph(3')-IIa	aph(3')-Ia	aph(6)-Id	aadA2	BLMT
FD01851477	+	+	+	+	+	+	+	K104Q	+	+	T599P	+	+	+	+	+	+	+	+	+	+	+	+	+	+	+	+	+	+	+	+	+	-	-	-	-	-	-	+	-	-	-	-	-	-	-	-	-	-
FD01875451	-	+	+	+	+	+	+	+	+	+	T599P	+	+	+	+	+	+	+	+	+	+	+	+	+	+	+	+	+	+	+	+	+	-	-	-	-	-	-	-	-	-	-	-	-	-	-	-	-	-
FD01875450	+	+	+	+	+	+	+	+	+	+	T599P	+	+	+	+	+	+	+	+	+	+	+	+	+	+	+	+	+	+	+	+	+	-	-	-	-	-	-	-	-	-	-	-	-	-	-	-	-	-
FD01852573	+	+	+	+	+	+	+	+	+	+	T599P	+	+	+	+	+	+	+	+	+	+	+	+	+	+	+	+	+	+	+	+	+	-	-	-	-	-	-	-	-	-	-	-	-	-	-	-	-	-
FD01852571	+	+	+	+	+	+	+	+	+	+	T599P	+	+	+	+	+	+	+	+	+	+	+	+	+	+	+	+	+	+	+	+	+	-	-	-	-	-	-	-	-	-	-	-	-	-	-	-	-	-
FD01851478	+	+	+	+	+	+	+	+	+	+	T599P	+	+	+	+	+	+	+	+	+	+	+	+	+	+	+	+	+	+	+	+	+	-	-	-	-	-	-	-	-	-	-	-	-	-	-	-	-	-
FD01851390	+	+	+	+	+	+	+	+	+	+	T599P	+	+	+	+	+	+	+	+	+	+	+	+	+	+	+	+	+	+	+	+	+	-	-	-	-	-	-	-	-	-	-	-	-	-	-	-	-	-
FD01851388	+	+	+	+	+	+	+	+	+	+	T599P	+	+	+	+	+	+	+	+	+	+	+	+	+	+	+	+	+	+	+	+	+	-	-	-	-	-	-	-	-	-	-	-	-	-	-	-	-	-
FD01848690	+	-	+	+	+	+	+	+	+	+	T599P	+	+	+	+	+	+	+	+	+	+	+	+	+	+	+	+	+	+	+	+	+	-	-	-	-	-	-	-	-	-	-	-	-	-	-	-	-	-
FD01848678	+	+	+	+	+	+	+	+	+	+	T599P	+	+	+	+	+	+	+	+	+	+	+	+	+	+	+	+	+	+	+	+	+	-	-	-	-	-	-	-	-	-	-	-	-	-	-	-	-	-
FD01848650	+	+	+	+	+	+	+	+	+	+	T599P	+	+	+	+	+	+	+	+	+	+	+	+	+	+	+	+	+	+	+	+	+	-	-	-	-	-	-	-	-	-	-	-	-	-	-	-	-	-
FD01848674	+	+	+	+	Q315R	+	+	+	+	+	T599P	+	+	+	+	+	+	+	+	+	+	+	+	+	+	+	+	+	+	+	+	+	-	-	-	-	-	-	-	-	-	-	-	-	-	-	-	-	-
FD01848677	+	+	+	+	+	+	+	+	+	+	T599P	+	+	+	+	+	+	+	+	+	+	+	+	+	+	+	+	+	+	+	+	+	-	-	-	-	-	-	-	-	-	-	-	-	-	-	-	-	-
FD01848679	+	+	+	+	+	+	+	+	+	+	T599P	+	+	+	+	+	+	+	+	+	+	+	+	+	+	+	+	+	+	+	+	+	-	-	-	-	-	-	-	-	-	-	-	-	-	-	-	-	-
FD01848681	+	+	+	+	+	+	+	+	+	+	T599P	+	+	+	+	+	+	+	+	+	+	+	+	+	+	+	+	+	+	+	+	+	-	-	-	-	-	-	-	-	-	-	-	-	-	-	-	-	-
FD01848684	+	+	+	+	+	+	+	+	+	+	T599P	+	+	+	+	+	+	+	+	+	+	+	+	+	+	+	+	+	+	+	+	+	-	-	-	-	-	-	-	-	-	-	-	-	-	-	-	-	-
FD01848687	+	+	+	+	+	+	+	+	+	+	T599P	+	+	+	+	+	+	+	+	+	+	+	+	+	+	+	+	+	+	-	+	+	-	-	-	-	-	-	-	-	-	-	-	-	-	-	-	-	-
FD01848689	+	+	+	+	+	+	+	+	+	+	T599P	+	+	+	+	+	+	+	+	+	+	+	+	+	+	+	+	+	+	+	+	+	-	-	-	-	-	-	-	-	-	-	-	-	-	-	-	-	-
FD01848694	+	-	+	+	+	+	+	+	+	+	T599P	+	+	+	+	+	+	+	+	+	+	+	+	+	+	+	+	+	+	+	+	+	-	-	-	-	-	-	-	-	-	-	-	-	-	-	-	-	-
FD01848696	+	A115G	+	+	+	+	+	+	+	+	T599P	+	+	+	+	+	+	+	+	+	+	+	+	+	+	+	+	+	+	-	+	+	-	-	-	-	-	-	-	-	-	-	-	-	-	-	-	-	-
FD01848699	+	+	+	+	+	+	+	+	+	+	T599P	+	+	+	+	+	+	+	+	+	+	+	+	+	+	+	+	+	+	-	+	+	-	-	-	-	-	-	-	-	-	-	-	-	-	-	-	-	-
FD01848700	+	+	+	+	+	+	+	+	+	+	T599P	+	+	+	+	+	+	+	+	+	+	+	+	+	+	+	+	+	+	+	+	+	-	-	-	-	-	-	-	-	-	-	-	-	-	-	-	-	-
FD01848702	+	+	+	+	+	+	+	+	+	+	T599P	+	+	+	+	+	+	+	+	+	+	+	+	+	+	+	+	+	+	+	+	+	-	-	-	-	-	-	-	-	-	-	-	-	-	-	-	-	-
FD01851425	+	X	+	+	x	+	+	+	+	+	T599P	+	+	+	+	+	+	+	+	+	+	+	+	+	+	+	+	+	+	-	+	+	-	-	-	-	-	-	-	-	-	-	-	-	-	-	-	-	-
FD01851448	+	X	+	+	X	+	+	+	+	+	T599P	+	+	+	+	+	+	+	G509D, G510D	+	X	+	X	+	+	+	+	-	+	-	+	+	-	-	-	-	-	-	-	-	-	-	-	-	-	-	-	-	-
FD01851369	+	+	+	+	+	+	+	+	+	+	T599P	+	+	+	+	+	+	+	+	+	X	+	+	+	X	+	+	+	+	+	+	+	-	-	-	-	-	-	-	-	-	-	-	-	-	-	-	-	-
FD01852858	+	+	+	+	+	+	+	+	+	+	T599P	+	+	+	+	+	+	+	+	+	+	+	+	+	+	+	+	+	+	+	+	+	-	-	-	-	-	-	-	-	-	-	-	-	-	-	-	-	-
FD01852587	+	+	+	+	T69A	+	+	+	-	+	+	+	+	+	-	+	+	+	+	+	+	X	D87G	+	+	+	+	+	+	+	+	+	-	-	-	-	-	-	-	-	-	-	-	-	-	-	-	-	-
FD01852549	+	+	+	+	T69A	+	+	+	+	+	+	+	+	+	+	+	+	+	+	+	+	+	S83F	+	+	+	+	+	+	+	+	+	-	-	-	-	-	-	-	-	-	-	-	-	-	-	-	-	-
FD01852548	+	X	+	+	T69A	+	+	+	+	+	+	+	+	+	+	+	+	+	+	+	+	+	+	+	+	+	+	+	+	-	+	+	-	-	-	-	-	-	-	-	-	-	-	-	-	-	-	-	-
FD01852535	+	X	+	+	T69A	+	+	+	+	+	+	+	+	+	+	+	+	+	+	+	+	+	+	+	+	+	+	+	+	+	+	+	-	-	-	-	-	-	-	-	-	-	-	-	-	-	-	-	-
FD01852865	+	+	+	+	T69A	+	+	+	+	+	+	+	+	+	+	+	+	+	+	+	+	+	+	E99K	+	+	+	+	+	+	+	+	-	-	-	-	-	-	-	-	-	IncC_P5	-	-	-	-	-	-	-
FD01852857	+	+	+	+	T69A	+	+	+	+	+	+	+	+	+	+	+	+	+	+	+	+	+	+	E99K	+	+	+	+	+	-	+	+	-	-	-	-	-	-	-	-	-	IncC_P5	-	-	-	-	-	-	-
FD01852684	+	+	+	+	X	+	+	+	+	+	+	+	+	+	+	+	+	+	+	+	+	+	+	E99K	+	+	+	+	+	+	+	+	-	-	-	-	-	-	-	-	-	-	-	-	-	-	-	-	-
FD01852558	+	+	+	+	T69A	+	+	+	+	+	+	+	+	+	+	+	+	+	+	+	+	+	X	E99K	+	+	+	+	+	+	+	+	-	-	-	-	-	-	-	-	-	-	-	-	-	-	-	-	-
FD01852530	+	X	+	+	T69A,N133D	+	+	+	+	+	+	+	+	+	+	+	+	+	-	+	X	A554T,T571S	+	E99K	+	+	+	-	+	-	+	+	-	-	-	-	-	-	-	+	-	-	-	-	-	-	-	-	-
FD01851386	+	+	+	+	T69A	+	+	+	+	+	+	+	+	+	+	+	+	+	+	+	+	+	+	E99K	+	+	+	+	+	+	+	+	-	-	-	-	-	-	-	-	-	-	-	-	-	-	-	-	-
FD01852799	+	+	+	+	T69A	+	+	+	+	+	+	+	+	+	+	+	+	+	+	+	+	+	+	E99K	+	+	+	+	+	+	+	+	-	-	-	-	-	-	-	-	-	-	-	-	-	-	-	-	-
FD01852863	+	+	+	+	T69A	+	+	+	+	+	+	+	+	+	+	+	+	+	+	+	+	+	+	+	+	+	+	+	+	+	+	+	-	-	-	-	-	-	-	-	-	-	-	-	-	-	-	-	-
FD01852478	+	+	+	+	T69A	+	+	+	+	+	+	+	+	+	+	+	+	+	+	+	+	+	+	+	+	+	+	+	+	+	+	H431Y	-	-	-	-	-	-	-	-	-	-	-	-	-	-	-	-	-
FD01852462	+	+	+	+	T69A	+	+	+	+	+	+	+	+	+	+	+	+	+	+	+	+	+	+	+	+	+	+	+	+	+	+	+	-	-	-	-	-	-	-	-	-	-	-	-	-	-	-	-	-
FD01852461	+	+	+	+	T69A	+	+	+	+	+	+	+	+	+	+	+	+	+	+	+	+	+	D87Y	+	+	+	+	+	+	+	+	+	-	-	-	-	-	-	-	-	-	-	-	-	-	-	-	-	-
FD01851557	+	R81H,S100R	+	+	T69A	+	+	+	+	+	+	+	+	+	+	+	+	+	+	+	+	+	+	+	+	+	+	+	+	-	+	+	-	-	-	-	-	-	-	-	-	-	-	-	-	-	-	-	-
FD01851391	+	+	+	+	T69A	+	+	+	+	+	+	+	+	+	+	+	+	+	+	+	+	+	+	+	+	+	+	+	+	+	+	+	-	-	-	-	-	-	-	-	-	-	-	-	-	-	-	-	-
FD01851333	+	+	+	+	T69A	+	+	+	+	+	+	+	+	+	+	+	+	+	+	+	+	+	+	+	+	+	+	+	+	+	+	+	-	-	-	-	-	-	-	-	-	-	-	-	-	-	-	-	-
FD01851320	+	+	+	+	T69A	+	+	+	+	+	+	+	+	+	+	+	+	+	+	+	+	+	+	+	+	+	+	+	+	+	+	+	-	-	-	-	-	-	-	-	-	-	-	-	-	-	-	-	-
FD01851392	+	+	+	+	T69A	+	+	+	+	+	+	+	+	+	+	+	+	+	+	+	+	+	+	+	+	+	+	+	+	+	+	+	-	-	-	-	-	-	-	-	-	-	-	-	-	-	-	-	-
FD01852545	+	A115E	+	+	X	+	+	+	+	+	+	+	+	+	+	+	+	+	-	+	+	+	+	+	+	+	+	+	+	-	+	+	-	-	-	-	-	-	-	+	-	-	-	-	-	-	-	-	-
FD01852531	+	X	+	+	T69A	+	+	+	+	+	+	+	+	+	+	+	+	+	+	+	+	+	+	+	+	+	+	+	+	+	+	+	-	-	-	-	-	-	-	-	-	-	-	-	-	-	-	-	-
FD01851528	+	+	+	+	T69A	+	+	+	+	+	+	+	+	+	+	+	+	+	+	+	+	+	X	+	+	+	+	+	+	+	+	+	-	-	-	-	-	-	-	-	-	-	-	-	-	-	-	-	-
FD01851503	+	+	+	+	T69A	+	+	+	+	+	+	+	+	+	+	+	+	+	+	+	+	+	+	+	+	+	+	+	+	-	+	+	-	-	-	-	-	-	-	-	-	-	-	-	-	-	-	-	-
FD01851502	+	+	+	+	T69A	+	+	+	+	+	+	+	+	+	+	+	+	+	+	+	+	+	+	+	+	+	+	+	+	-	+	+	-	-	-	-	-	-	-	-	-	-	-	-	-	-	-	-	-
FD01848615	+	+	+	+	T69A	+	+	+	+	+	+	+	+	+	+	+	+	+	+	+	+	+	+	+	+	+	+	+	+	+	+	+	-	-	-	-	-	-	-	-	-	-	-	-	-	-	-	-	-
FD01848613	+	+	+	+	T69A	+	+	+	+	+	+	+	+	+	+	+	+	+	+	+	+	+	+	+	+	+	+	+	+	+	+	+	-	-	-	-	-	-	-	-	-	-	-	-	-	-	-	-	-
FD01848616	+	+	+	+	T69A	+	+	+	+	+	+	+	+	+	+	+	+	+	+	+	+	+	+	+	+	+	+	+	+	+	+	+	-	-	-	-	-	-	-	-	-	-	-	-	-	-	-	-	-
FD01851499	+	-	+	+	T69A	+	+	+	+	+	+	+	+	+	+	+	+	+	+	+	+	+	+	+	+	+	+	+	+	+	+	+	-	-	-	-	-	-	-	-	-	-	-	-	-	-	-	-	-
FD01851500	+	+	+	+	T69A	+	+	+	+	+	+	+	+	+	+	+	+	+	+	+	+	+	+	+	+	+	+	+	+	+	+	+	-	-	-	-	-	-	-	-	-	-	-	-	-	-	-	-	-
FD01851501	+	+	+	+	T69A	+	+	+	+	+	+	+	+	+	+	+	+	+	+	+	+	+	+	+	+	+	+	+	+	+	+	+	-	-	-	-	-	-	-	-	-	-	-	-	-	-	-	-	-
FD01851506	+	+	+	+	T69A	+	+	+	+	+	+	+	+	+	+	+	+	+	+	+	+	+	+	+	+	+	+	+	+	-	+	+	-	-	-	-	-	-	-	-	-	-	-	-	-	-	-	-	-
FD01851509	+	+	+	+	T69A	+	+	+	+	+	+	+	+	+	+	+	+	+	+	+	+	+	+	+	+	+	+	+	+	+	+	+	-	-	-	-	-	-	-	-	-	-	-	-	-	-	-	-	-
FD01851516	+	+	+	+	T69A	+	+	+	+	+	+	+	+	+	+	+	+	+	+	+	+	+	+	+	+	+	+	+	+	+	+	+	-	-	-	-	-	-	-	-	-	-	-	-	-	-	-	-	-
FD01851517	+	+	+	+	T69A	+	+	+	+	+	+	+	+	+	+	+	+	+	+	+	+	+	+	+	+	+	+	+	+	+	+	+	-	-	-	-	-	-	-	-	-	-	-	-	-	-	-	-	-
FD01851519	+	+	+	+	T69A	+	+	+	+	+	+	+	+	+	+	+	+	+	+	+	+	+	+	+	+	+	+	+	+	+	+	+	-	-	-	-	-	-	-	-	-	-	-	-	-	-	-	-	-
FD01851527	+	+	+	+	T69A	+	+	+	+	+	+	+	+	+	+	+	+	+	+	+	+	+	+	+	+	+	+	+	+	+	+	+	-	-	-	-	-	-	-	-	-	-	-	-	-	-	-	-	-
FD01851529	+	+	+	+	T69A	+	+	+	+	+	+	+	+	+	+	+	+	+	+	+	+	+	+	+	+	+	+	+	+	-	+	+	-	-	-	-	-	-	-	-	-	-	-	-	-	-	-	-	-
FD01851530	+	-	+	+	X	+	+	+	+	+	+	+	+	+	+	+	+	+	+	+	+	+	+	+	+	+	+	+	+	+	+	+	-	-	-	-	-	-	-	-	-	-	-	-	-	-	-	-	-
FD01851532	+	+	+	+	T69A	+	+	+	+	+	+	+	+	+	+	+	+	+	+	+	+	+	+	+	+	+	+	+	+	+	+	+	-	-	-	-	-	-	-	-	-	-	-	-	-	-	-	-	-
FD01851535	+	+	+	+	T69A	+	+	+	+	+	+	+	+	+	+	+	+	+	+	+	+	+	+	+	+	+	+	+	+	-	+	+	-	-	-	-	-	-	-	-	-	-	-	-	-	-	-	-	-
FD01851536	+	+	+	+	T69A	+	+	+	+	+	+	+	+	+	+	+	+	+	+	+	+	+	+	+	+	+	+	+	+	-	+	+	-	-	-	-	-	-	-	-	-	-	-	-	-	-	-	-	-
FD01851538	+	X	+	+	T69A,N199H	X	+	+	+	+	+	+	+	+	+	+	+	+	-	+	X	+	+	+	+	+	+	-	+	-	+	+	-	-	-	-	-	-	-	+	-	-	-	-	-	-	-	-	-
FD01851541	+	X	+	+	T69A	+	+	+	+	+	+	+	+	+	+	+	+	+	+	+	+	+	+	+	+	+	+	+	+	+	+	+	-	-	-	-	-	-	-	-	-	-	-	-	-	-	-	-	-
FD01846446	+	L39P	+	+	+	+	L332F	+	+	+	+	+	+	+	+	+	+	+	+	+	+	A554T	+	+	+	+	+	+	+	+	+	+	-	-	-	+	-	-	-	-	-	-	-	IncHI2_P1	-	-	IncHI2_P1	P8	-
FD01846422	+	L39P	+	+	+	+	L332F	+	+	+	+	+	+	+	+	+	+	+	+	+	+	A554T	+	+	+	+	+	+	+	+	+	+	+	-	+	+	+	+	-	-	-	-	-	IncHI2_P1	-	-	IncHI2_P1	-	-
FD01872670	+	L39P	+	+	+	+	L332F	+	+	+	+	+	+	+	+	+	+	+	+	+	+	+	+	+	+	+	+	+	+	+	+	+	+	-	-	+	-	-	-	-	-	-	-	IncHI2_P1	-	-	IncHI2_P1	IncI2_P3	-
FD01852637	+	+	+	+	S157A	R590H	+	+	+	+	+	+	+	+	+	+	+	+	+	+	+	+	S83Y	+	+	+	+	+	+	+	+	H431Y	-	-	-	-	-	-	-	-	P9	-	-	-	-	-	-	-	-
FD01852500	+	X	+	-	S157A	R590H	+	+	+	+	+	+	+	+	+	+	+	+	+	+	+	+	S83Y	+	+	+	+	+	+	-	+	H431Y	-	-	-	-	-	-	-	-	P4	-	-	-	-	P16	-	-	-
FD01852499	+	X	+	+	x	+	+	+	+	+	+	+	+	+	+	+	+	+	+	+	S347P	R360H,R365H	S83Y	+	+	+	+	+	+	+	+	H431Y	-	-	-	-	-	-	-	-	P4	-	-	-	-	-	-	-	-
FD01852484	+	+	+	+	S157A	R590H	+	+	+	+	+	+	+	+	+	+	+	+	+	+	+	+	S83Y	+	+	+	+	+	+	+	+	H431Y	-	-	-	-	-	-	-	-	P4	-	-	-	-	P4	-	-	-
FD01852476	+	+	+	+	S157A	R590H	+	+	+	+	+	+	+	+	+	+	+	+	+	+	+	+	S83Y	+	+	+	+	+	+	-	+	+	-	-	-	-	-	-	-	-	P4	-	-	-	-	P16	-	-	-
FD01852492	+	+	+	+	S157A	R590H	+	+	+	+	+	+	+	+	+	+	+	+	+	+	+	+	S83Y	+	+	+	+	+	+	+	+	H431Y	-	-	-	-	-	-	-	-	P4	-	P6	P4	-	-	-	-	-
FD01852792	+	+	+	+	+	+	+	+	+	+	R418H	+	+	+	+	+	+	+	+	+	+	+	+	+	X	+	+	+	+	+	+	+	-	-	-	-	-	-	-	-	-	-	-	-	-	-	-	-	-
FD01852748	+	+	+	+	R512H	+	+	+	+	+	R418H	+	+	+	+	+	+	+	+	+	+	+	+	+	+	+	+	+	+	+	+	+	-	-	-	-	-	-	-	-	-	-	-	-	-	-	-	-	-
FD01852626	+	+	+	+	R512H	+	+	+	+	+	R418H	+	+	+	+	+	+	+	+	+	+	+	+	+	+	+	+	+	+	+	+	+	-	-	-	-	-	-	-	-	-	-	-	-	-	-	-	-	-
FD01852600	+	+	+	+	R512H	+	+	+	+	+	R418H	+	+	+	+	+	+	+	+	+	+	+	+	+	+	+	+	+	+	+	+	+	-	-	-	-	-	-	-	-	-	-	-	-	IncI1-I(Alpha)_P14	-	-	-	IncI1-I(Alpha)_P14
FD01852653	+	+	+	+	+	T81S	+	+	+	+	+	+	+	+	+	+	+	+	+	+	+	+	+	+	+	+	+	+	+	-	+	+	-	-	-	-	-	-	-	-	-	-	-	-	-	-	-	-	-
FD01852647	+	+	+	+	+	+	V482A, A491T	+	+	+	+	+	+	+	+	+	+	+	+	+	+	+	+	+	+	+	+	+	+	+	+	+	-	-	-	-	-	-	-	-	-	-	-	P2	-	-	P2	-	-
FD01852523	+	X	+	+	+	+	+	+	+	+	+	+	+	+	+	+	+	+	+	+	+	+	+	+	+	+	+	+	+	+	+	A366D	-	-	-	-	-	-	-	-	-	-	-	-	-	-	-	-	-
FD01851394	+	X	+	+	+	+	+	+	+	+	+	+	+	+	+	+	+	+	+	+	+	+	+	+	+	+	+	+	+	+	+	+	-	+	-	-	-	-	-	-	-	-	-	P2	-	-	P2	-	-
FD01852582	+	+	+	+	+	+	+	+	+	+	L845F	+	+	+	+	+	+	+	+	+	+	+	+	+	+	+	+	+	+	+	+	+	-	-	-	-	-	-	-	-	-	-	-	P2	-	-	P2	-	-
FD01852539	+	+	+	+	N113K	+	+	+	+	+	+	+	+	+	+	+	+	+	+	+	X	+	+	+	+	+	+	+	+	-	+	A366D	-	-	-	-	-	-	-	-	-	-	-	-	-	-	-	-	-
[truncated: 31 more columns]

## Sheet: Table S4
Supplementary Table S4. AMR genes and plasmids characterization using Mob_suite.
Replicon and plasmid name	Cluster	Predicted mobility	SC	Plasmids by Strain	Acquired AMR genes	# AMR GENES
IncHI2_P1	AA738	conjugative	SC9	p1-FD01846422	aph(3'')-Ib,aph(6)-Id,qnrE2,tetD,tetA,floR,blaTEM-181,mcr-1	8
			SC9	p1-FD01846446	aph(3'')-Ib,aph(6)-Id,qnrE2,tetD	4
			SC9	p1-FD01872670	aph(3'')-Ib,aph(6)-Id,qnrE2,tetD,tetA,floR,tetR	7
P2	AB595	mobilizable	SC2	p1-FD01852647	aph(3'')-Ib,aph(6)-Id,sul2,tetR,tetA	5
			SC2	p1-FD01851394	aph(3'')-Ib,aph(6)-Id,sul2	3
			SC2	p1-FD01852582	aph(3'')-Ib,aph(6)-Id,sul2	3
IncI2_P3	AA372	conjugative	SC9	p2-FD01872670	mcr-1,aadA2,dfrA12,linG	4
			SC9	p2-FD01846446	mcr-1	1
P4	AG456	non-mobilizable	SC8	p1-FD01852484	aac(3)-IIe, blaTEM-181,aph(3')-Ia	3
			SC8	p1-FD01852492	aac(3)-Iie, blaTEM-181, aph(3')-Ia, blaTEM-176	4
			SC8	p1-FD01852476	aac(3)-IIe, blaTEM-181	2
			SC8	p1-FD01852499	aac(3)-IIe, blaTEM-181	2
			SC8	p1-FD01852500	aac(3)-IIe, blaTEM-181	2
IncC_P5	AA627	mobilizable	SC15	p1-FD01852865	aac(6')-Ian,sul2,tetB	3
			SC15	p1-FD01852857	aac(6')-Ian,sul2,tetB	3
P6	AG658	non-mobilizable	SC9	p2-FD01846446	sul3	2
			SC9	p3-FD01872670	sul3	2
			SC8	p2-FD01852492	sul3,ant(3'')-Iia	3
			SC9	p2-FD01846422	sul3	2
			SC8	p2-FD01852484	sul3,ant(3'')-Iia	3
IncI-gamma/K1_P7	AA474	conjugative	SC8	p2-FD01852476	blaCTX-M-15	1
			SC8	p2-FD01852484	dfrA1,floR	2
			SC8	p3-FD01852492	dfrA1,floR	2
P8	AD312	non-mobilizable	SC9	p3-FD01846446	aadA2,dfrA12,linG,mcr-1,floR,tetA	5
P9	AC302	non-mobilizable	SC8	p1-FD01852637	aac(3)-Iie,blaTEM-181,tetA	3
P10	AG600	non-mobilizable	SC8	p2-FD01852476	tetA	1
IncFIB(S)_P11	AB460	conjugative	SC2	p1-FD01852539	tetA	1
			SC9	p4-FD01872670	blaTEM-181	1
			SC2	p1-FD01852523	tetA	1
			SC9	p4-FD01846446	blaTEM-181	1
IncFIB(pN55391)_P12	AC358	mobilizable	SC15	p1-FD01852558	fosA3	1
			SC18	p2-FD01851477	dfrA14	1
Col(pHAD28)_P13	AB042	mobilizable	SC2	p1-FD01852523	QnrB5	1
			SC16	p1-FD01852535	QnrB5	1
			SC2	p2-FD01852539	QnrB5	1
			SC16	p1-FD01852549	QnrB5	1
			SC2	p1-FD01852653	QnrB5	1
			SC13	p1-FD01852545	QnrB5	1
			SC8	p2-FD01852637	QnrB5	1
			SC8	p2-FD01852499	QnrB19	1
			SC8	p1-FD01852492	QnrB5	1
			SC8	p3-FD01852484	QnrB5	1
			SC8	p1-FD01852476	QnrB19	1
IncI1-I(Alpha)_P14	AA473	conjugative	SC3	p1-FD01852748	blaSHV-12,blaSHV-134	2
			SC3	p1-FD01852600	aph(3')-Ia,BLMT	2
P15	AA174	mobilizable	SC8	p3-FD01852500	tetA	1
P16	AA675	non-mobilizable	SC8	p3-FD01852476	aph(3')-Ia	1
			SC8	p4-FD01852500	aph(3')-Ia	1
IncN_P17	AA551	conjugative	SC2	p2-FD01852653	tetR,tetA	1
			SC2	p1-FD01852582	tetR,tetA	1
				50 plasmids		106

## Sheet:  Table S5
Supplementary Table S5. Overview of known and new chromosomal mutations and phenotypic correspondence
Antibiotic class	Gene	Point mutation	# strains	Resistant Phenotype	Strains
Aminoglycoside	acrB1	T599P	27	-
		R418H	4	-
		L845F	1	-
	kdpE	A115G,A115E	2	-
		L39P	3	-
		R81H,S100R	1	-
	mdtB	T69A	41	-
		S157A	5	-
		N199H	1	-
		R512H	3	-
		Q315R	1	-
		R590H	5	-
	mdtC	T81S	1	-
		N113K	1	-
		N133D	1	-
Fluoroquinolone	emrB	G509D, G510D	1	New mutation, Non associated to CIP, NA	FD01851448
	gyrB	S347P	1	New mutation, Non associated to CIP, NA	FD01852499
	parC	A554T	3	New mutation, associated to NA	FD01852530,FD01846422,FD01846446
		R360H,R365H	1	New mutation, Non associated to CIP, NA	FD01852499
		T571S	1	New mutation, associated to NA	FD01852530
Multiclass	acrB2	L332F	3	New mutation, Non associated to NA,CIP,TE,C, AM,AMC,CTX,CAZ	FD01846446,FD01846422,FD01872670
		V482A, A491T	1	New mutation, Non associated to NA,CIP,TE,C, AM,AMC,CTX,CAZ	FD01852647
	sdiA	K104Q	1	New mutation, only associated to NA	FD01851477
Nitrofurantoin	nfsA	E99K	7	Known mutation, Non associated to N	FD01852865,FD01852857,FD01852684,FD01852558,FD01852530,FD01851386,FD01852799
Microcin	yojI	H431Y	6	-
		A366D	2	-

## Sheet:  Table S6
Supplementary Table 6. Top 20 ranked p-values from SNPs associated with nitrofurantoin resistance using Firth logistic regression.
CHR	SNP	BP	TestedAllele	p.value	OR	lower95ci	upper95ci
1	NC_003197.2:4604675	4604675	NC_003197.2.4604675_A	0.0019799143957836	9.98128259980897	2.22600210355979	132.694639557771
1	NC_003197.2:4386779	4386779	NC_003197.2.4386779_T	0.00550939559992092	4.1703652555379	1.53226447684621	12.9625895919909
1	NC_003197.2:3910634	3910634	NC_003197.2.3910634_A	0.00777025300775813	5.64774458814962	1.58189410989546	27.8806220971136
1	NC_003197.2:4809374	4809374	NC_003197.2.4809374_T	0.00777025300775813	5.64774458814962	1.58189410989546	27.8806220971136
1	NC_003197.2:1769774	1769774	NC_003197.2.1769774_A	0.0463366921701578	7.15859523830713	1.02885099231233	351031622.193575
1	NC_003197.2:3447686	3447686	NC_003197.2.3447686_T	0.0463366921701578	7.15859523830713	1.02885099231233	351031622.193575
1	NC_003197.2:3578847	3578847	NC_003197.2.3578847_T	0.0616085266645943	0.223513100794901	0.0240717539620654	1.08856989588944
1	NC_003197.2:95781	95781	NC_003197.2.95781_A	0.0709115080454256	0.207093246897594	0.012449598493501	1.12436207139494
1	NC_003197.2:2892875	2892875	NC_003197.2.2892875_A	0.0773853389508564	4.0721339552965	0.833192483274426	29.0758420629086
1	NC_003197.2:2892876	2892876	NC_003197.2.2892876_A	0.0773853389508564	4.0721339552965	0.833192483274426	29.0758420629086
1	NC_003197.2:354353	354353	NC_003197.2.354353_T	0.0855610928965354	0.210007330096116	0.0127056969977694	1.2281740790754
1	NC_003197.2:1086116	1086116	NC_003197.2.1086116_T	0.114337351679543	0.295221513381681	0.0586286763339424	1.42376726535622
1	NC_003197.2:15775	15775	NC_003197.2.15775_T	0.138770656643273	2.8081216806057	0.682352499030976	11.2689034311063
1	NC_003197.2:3617904	3617904	NC_003197.2.3617904_C	0.147250915083896	0.269606673513564	0.0186631670953118	1.56588835829259
1	NC_003197.2:17435	17435	NC_003197.2.17435_T	0.177822451668868	7043.46278989782	0.358539431337822	3.85868402388358e+26
1	NC_003197.2:172583	172583	NC_003197.2.172583_T	0.177822451668868	7043.46278989782	0.358539431337822	3.85868402388358e+26
1	NC_003197.2:277018	277018	NC_003197.2.277018_T	0.177822451668868	7043.46278989782	0.358539431337822	3.85868402388358e+26
1	NC_003197.2:439886	439886	NC_003197.2.439886_T	0.177822451668868	7043.46278989782	0.358539431337822	3.85868402388358e+26
1	NC_003197.2:441539	441539	NC_003197.2.441539_C	0.177822451668868	7043.46278989782	0.358539431337822	3.85868402388358e+26
1	NC_003197.2:824989	824989	NC_003197.2.824989_G	0.177822451668868	7043.46278989782	0.358539431337822	3.85868402388358e+26
